# Supplementary material for: A high-performance chiral 19F-labeled probe with an increased structural twisting
Source: Royal Society of Chemistry journal article supplement (doi:10.1039/d4cc01313a), 2024-01-01

# Supporting Information

## A high-performance chiral $^{19}\text{F}$ -labeled probe with an increased structural twisting

Chenyang Wang,<sup>1,2</sup> Guangxing Gu,<sup>2</sup> Wei Zhang,<sup>2</sup> Jian Wu,<sup>3</sup> and Yanchuan Zhao<sup>1,2,3\*</sup>

<sup>1</sup>The Education Ministry Key Lab of Resource Chemistry and Shanghai Key Laboratory of Rare Earth Functional Materials, Shanghai Normal University, Shanghai 200234, China

<sup>2</sup>Key Laboratory of Fluorine and Nitrogen Chemistry and Advanced Materials, Shanghai Institute of Organic Chemistry, University of Chinese Academy of Sciences, Chinese Academy of Sciences, Shanghai 200032, China

<sup>3</sup>Instrumental Analysis Center, Shanghai Institute of Organic Chemistry, Chinese Academy of Sciences, Shanghai, 200032, China

\*Correspondence: zhaoyanchuan@sioc.ac.cn.

## Content

|                                                                                                                   |            |
|-------------------------------------------------------------------------------------------------------------------|------------|
| <b>General Methods and Materials.....</b>                                                                         | <b>S3</b>  |
| <b>Procedure for the Preparation of Ligand.....</b>                                                               | <b>S5</b>  |
| <b>Procedure for the Preparation of Probe-2.....</b>                                                              | <b>S6</b>  |
| <b>Multicomponent Detection via Probe-2.....</b>                                                                  | <b>S7</b>  |
| <b>Evaluation of Enantiomeric Excess Values with Probe-2.....</b>                                                 | <b>S8</b>  |
| <b>Differentiation of Chiral Amines Using Probe-2 .....</b>                                                       | <b>S19</b> |
| <b>Evaluation of Enantiomeric Excess Values of Crude Reaction Product.....</b>                                    | <b>S20</b> |
| <b>Evaluation of Influence of the Presence of Ligand L1/L2 on Chiral Discrimination<br/>of Nitriles.....</b>      | <b>S23</b> |
| <b>Comparison Between the Performance of Probe-2 and Probe-3 Both Labeled with<br/>a <sup>19</sup>F Atom.....</b> | <b>S24</b> |
| <b>DFT Calculation of Probe-1 and Probe-2.....</b>                                                                | <b>S25</b> |
| <b>References.....</b>                                                                                            | <b>S28</b> |
| <b><sup>1</sup>H, <sup>19</sup>F, and <sup>13</sup>C{<sup>1</sup>H} NMR Spectra of All New Compounds.....</b>     | <b>S29</b> |

## General Methods and Materials

**Material:** All reactions were carried out under nitrogen using standard Schlenk techniques unless otherwise noted. All solvents were of ACS reagent grade or better unless otherwise noted. **Probe-1** and **probe-3** were synthesized according to literature procedures.<sup>1,2</sup> Silica gel (60  $\mu\text{m}$ ) was purchased from SiliCycle Inc. All reagent-grade materials were purchased from commercial sources and used without further purification.

**Infrared Spectroscopy:** Infrared spectra were recorded on an HP5973 Fourier Transform Infrared Spectrometer (FT-IR).

**Mass Spectrometry:** High-resolution mass spectra (HRMS) were obtained at the SIOC Instrumentation Facility employing ESI or EI as the ionization technique.

**NMR Spectroscopy:**  $^1\text{H}$ ,  $^{19}\text{F}$ , and  $^{13}\text{C}\{^1\text{H}\}$  NMR spectra for products characterization were recorded by Agilent-400, Bruker Avance-400, or Bruker Avance-600 spectrometer, chemical shifts ( $\delta$ ) are reported in parts per million (ppm) and referenced with TMS or solvent residue for  $^1\text{H}$  NMR and  $^{13}\text{C}\{^1\text{H}\}$  NMR, and  $\text{CFCl}_3$  for  $^{19}\text{F}$  NMR. The solutions used for analysis were prepared by mixing the probe and analyte in  $\text{CDCl}_3$ .  $^{19}\text{F}$  NMR spectra were recorded on a Bruker Avance neo 600 NMR spectrometer (565 MHz for  $^{19}\text{F}$  nucleus) using a scan number of 64.

**DFT Calculation:** Structures of **probe-1** and **probe-2** were calculated using Spartan' 20,<sup>3</sup> the  $\omega\text{B97X-D}$  function and the 6-31G\* & LANL2DZ>Kr basis set were used for structure optimization.

### General procedure for NMR experiment:

**Preparation of NMR Samples.** For Figure 1, precise quantities of analytes were dissolved in deuterated chloroform ( $\text{CDCl}_3$ ) to prepare stock solutions at the desired concentration (51 mM for **A<sub>1</sub>-A<sub>7</sub>**; 17 mM for **A<sub>8</sub>-A<sub>19</sub>**). Additionally, stock solutions of **probe-1** (8.5 mM, corresponding to 42 mg in 10 mL of  $\text{CDCl}_3$ ) and **probe-2** (17 mM, equivalent to 75 mg in 10 mL of  $\text{CDCl}_3$ ) were prepared. For the analysis involving **probe-1**, a mixture consisting of 200  $\mu\text{L}$  of the **probe-1** solution (containing 0.8 mg of **probe-1**), 100  $\mu\text{L}$  of the analyte solution (containing 0.2–1.1 mg of the analyte), and 100  $\mu\text{L}$  of pure  $\text{CDCl}_3$  was prepared and transferred to an NMR tube for  $^{19}\text{F}$  NMR measurements. Similarly, for the experiments with **probe-2**, 200  $\mu\text{L}$  of the **probe-2** solution (containing 1.5 mg of **probe-2**) and 200  $\mu\text{L}$  of the analyte solution (containing between 0.5–1.0 mg of the analyte) were combined and placed into an NMR tube for  $^1\text{H}$ -decoupled  $^{19}\text{F}$  NMR spectroscopy.

For the studies represented in Figure 3, approximately 1.5 mg of **probe-2** was mixed with the raw reaction mixture in  $\text{CDCl}_3$  and then transferred into an NMR tube to conduct  $^1\text{H}$ -decoupled  $^{19}\text{F}$  NMR measurements.

**NMR Measurements.** For Figure 1,  $^1\text{H}$ -decoupled  $^{19}\text{F}$  NMR spectra were recorded on a Bruker Avance neo 600 NMR spectrometer (565 MHz for  $^{19}\text{F}$  nucleus) at 298 K, using a default relaxation delay (D1) of 1 s and a scan number of 64. For Figures S2,  $^1\text{H}$ -decoupled  $^{19}\text{F}$  NMR spectra were recorded on a Bruker Avance neo 600 NMR spectrometer (565 MHz for  $^1\text{H}$ -decoupled  $^{19}\text{F}$  nucleus

at 298 K, using a default relaxation delay (D1) of 1 s and a scan number of 256. For Figure S3, S16, S19 and S20,  $^1\text{H}$ -decoupled  $^{19}\text{F}$  NMR spectra were recorded on a Bruker Avance neo 600 NMR spectrometer (565 MHz for  $^1\text{H}$ -decoupled  $^{19}\text{F}$  nucleus at 298 K, using a default relaxation delay (D1) of 1 s and a scan number of 32.

## General Procedures for the Preparation of Fluorinated Ligands

a) amidation

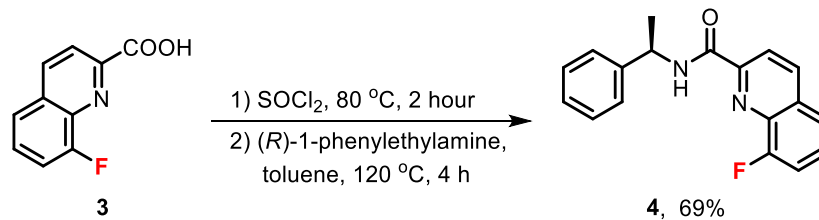

b) C-H palladation

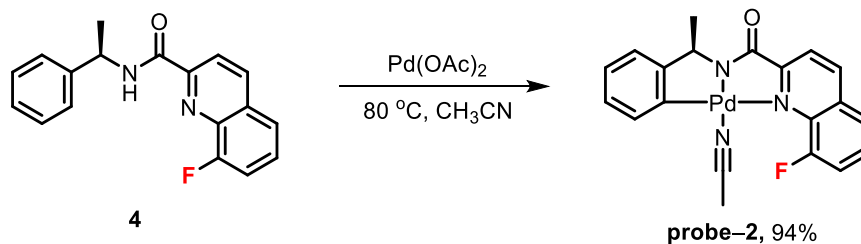

**Figure S1.** Synthetic Route for  $^{19}\text{F}$ -labeled Cyclopalladium **Probe-2**

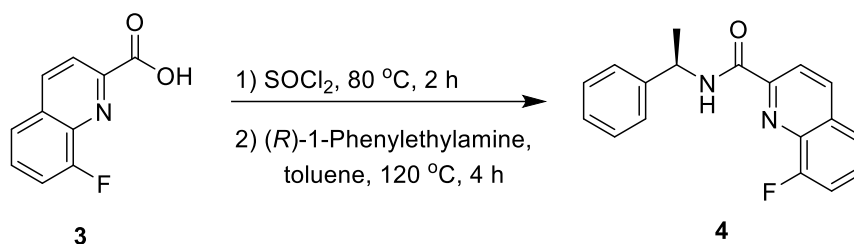

A solution of 8-Fluoro-2-quinolinecarboxylic acid (100 mg, 0.523 mmol, 1.0 equiv) in  $\text{SOCl}_2$  (2 mL) was heated to 80 °C for 2 hours, and then  $\text{SOCl}_2$  was removed by vacuum pumping, resulting in the precipitated of a white solid in the reaction vessel. To dissolve the white solid, 20 ml toluene was added in the reaction flask, and after 5 minutes, (*R*)-Phenylethylamine (127 mg, 1.05 mmol, 2 equiv) was introduced into the solution. The reaction mixture was stirred at 120 °C for 4 hours. The organic layer was then concentrated under reduced pressure. The resulting residue was subjected to purification through silica gel column chromatography (EtOAc/hexane = 1/4) to give ligand **4** as a white solid (103 mg, yield: 69%). M.P.: 130 – 132 °C.

$^1\text{H}$  NMR (400 MHz,  $\text{CDCl}_3$ )  $\delta$  8.54 (d,  $J$  = 8.5 Hz, 1H), 8.34 (q,  $J$  = 9.0, 7.3 Hz, 2H), 7.65 (d,  $J$  = 8.2 Hz, 1H), 7.54 (m,  $J$  = 7.9, 4.9 Hz, 1H), 7.48 – 7.40 (m, 3H), 7.35 (t,  $J$  = 7.7 Hz, 2H), 7.31 – 7.23 (t, 1H), 5.37 (m,  $J$  = 7.2 Hz, 1H), 1.68 (d,  $J$  = 6.8 Hz, 3H).  $^{19}\text{F}$  NMR (376 MHz,  $\text{CDCl}_3$ )  $\delta$  -124.18 (dd,  $J$  = 10.7, 5.0 Hz).  $^{13}\text{C}$  NMR (101 MHz,  $\text{CDCl}_3$ )  $\delta$  163.20, 158.07 (d,  $J$  = 258.9 Hz), 149.92, 143.25, 137.30 (d,  $J$  = 3.1 Hz), 136.86 (d,  $J$  = 12.4 Hz), 130.81 (d,  $J$  = 1.9 Hz), 128.72, 127.81 (d,  $J$  = 8.1 Hz), 127.36, 126.26, 123.39 (d,  $J$  = 4.8 Hz), 119.94, 114.12 (d,  $J$  = 18.6 Hz), 49.03, 22.15. IR (KBr): 3387, 3325, 3087, 3061, 3028, 2958, 2926, 2853, 1935, 1753, 1676, 1626, 1602, 1570, 1530, 1498, 1470, 1448, 1428, 1376, 1327, 1314, 1292, 1239, 1264, 1207, 1190, 1160, 1131, 1111, 1078, 1061, 1045, 1020, 993, 970, 927, 912, 893, 882, 860, 841, 816, 772, 740, 716, 698, 602, 590, 569, 558, 529, 500, 479  $\text{cm}^{-1}$ .

HRMS (ESI):  $\text{C}_{18}\text{H}_{16}\text{FN}_2\text{O}^+$   $[\text{M}+\text{H}]^+$  calc. 295.12412, found: 295.12363.

## Procedures for the Preparation of probe-2

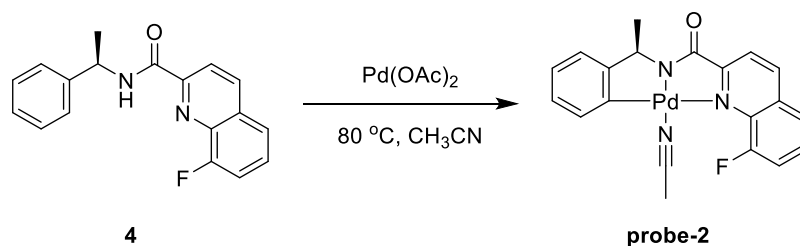

Ligand **4** (100 mg, 0.34 mmol, 1.0 equiv) was added to a solution of Pd(OAc)<sub>2</sub> (84 mg, 0.37 mmol, 1.1 equiv) in acetonitrile (15 mL). The resulting mixture was stirred at 80 °C for 4 h, and filtered through a 0.22 μm syringe filter. The filtrate was concentrated to give the crude product which was transferred to a filter funnel and washed extensively with water and hexane. The yellow powder was then dried under vacuum to give **probe-2** as a yellow solid (140 mg, yield: 94%). M.P.: 180 – 182 °C.

<sup>19</sup>F NMR (376 MHz, CDCl<sub>3</sub>) δ -117.93 (dd, *J* = 11.5, 4.5 Hz). <sup>1</sup>H NMR (400 MHz, CDCl<sub>3</sub>) δ 8.37 (s, 2H), 7.67 (d, *J* = 8.2 Hz, 1H), 7.52 (td, *J* = 8.0, 4.4 Hz, 1H), 7.47 – 7.37 (m, 1H), 7.05 (t, *J* = 8.1 Hz, 2H), 6.98 – 6.83 (m, 2H), 5.30 – 5.22 (m, 1H), 2.39 (s, 3H), 1.58 (d, *J* = 6.5 Hz, 3H). <sup>13</sup>C NMR (101 MHz, CDCl<sub>3</sub>) δ 167.69, 161.63, 159.93, 156.08 (d, *J* = 258.6 Hz), 141.70, 139.20 (d, *J* = 2.9 Hz), 135.93 (d, *J* = 11.4 Hz), 133.11, 131.70, 127.06 (d, *J* = 7.8 Hz), 125.01, 124.43, 124.35 (d, *J* = 4.7 Hz), 122.53 (d, *J* = 15.4 Hz), 117.21, 115.16 (d, *J* = 19.9 Hz), 63.15, 23.45, 3.29. IR (KBr): 3048, 2962, 2922, 2855, 1732, 1689, 1616, 1556, 1507, 1456, 1433, 1389, 1373, 1308, 1253, 1199, 1167, 1123, 1084, 1053, 1023, 946, 919, 888, 854, 813, 748, 726, 660, 642, 626, 572, 244, 482, 447, 426, 403 cm<sup>-1</sup>. HRMS (ESI): C<sub>20</sub>H<sub>17</sub>FN<sub>3</sub>OPd<sup>+</sup> [M+H]<sup>+</sup> calc. 440.0385, found: 440.0393.

## Multicomponent Detection via probe-2

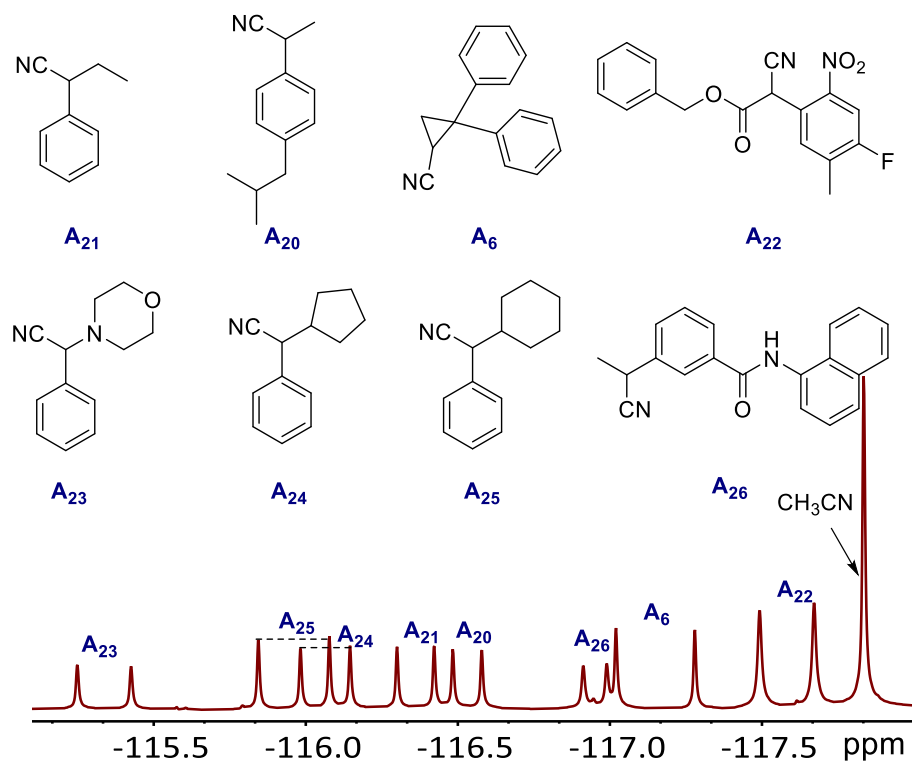

**Figure S2.** <sup>1</sup>H-decoupled <sup>19</sup>F NMR spectra of mixtures of **probe-2** (ca. 3.5 mg), and 8 pairs of enantiomers (each ca. 0.8–4.5 mg) in CDCl<sub>3</sub>. <sup>1</sup>H-decoupled <sup>19</sup>F NMR spectra were recorded on a Bruker Avance neo 600 NMR spectrometer (565 MHz for <sup>1</sup>H-decoupled <sup>19</sup>F nucleus) using a scan number of 256.

## Evaluation of Enantiomeric Excess Values with Probe-2

### a) $^{19}\text{F}$ NMR spectra for measurement of enantiocomposition

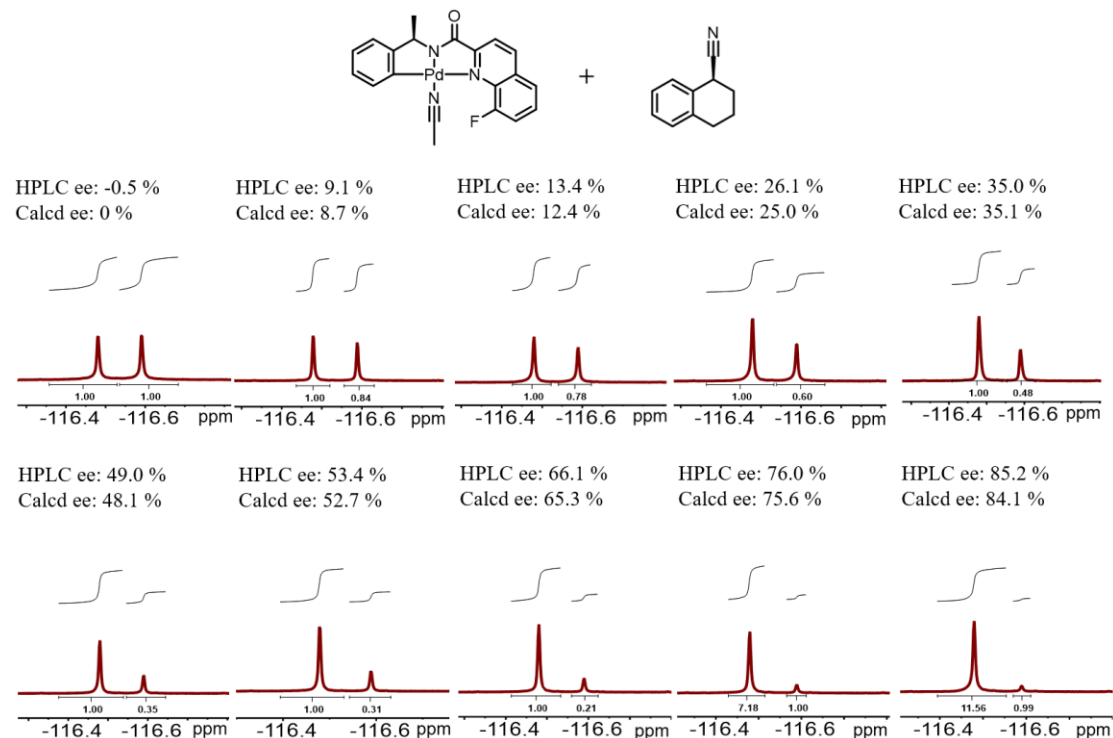

**Figure S3.** Evaluation of the *ee* values of enantioenriched 1,2,3,4-tetrahydronaphthalene-1-carbonitrile (**A**<sub>7</sub>).  $^1\text{H}$ -decoupled  $^{19}\text{F}$  NMR spectrum of a mixture of **probe-2** (ca. 1.5 mg) and **A**<sub>7</sub> (ca. 2.4 mg) in  $\text{CDCl}_3$ .  $^{19}\text{F}$  NMR spectra were recorded on a Bruker AVANCE NEO 600 NMR spectrometer (565 MHz for the  $^{19}\text{F}$  nucleus) using a scan number of 64.

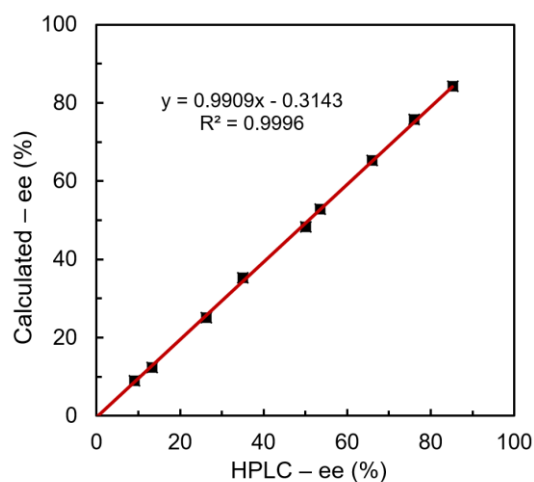

**Figure S4.** A plot depicting the linear relationship between measured ee using **probe-2** versus the actual ee. Measurements were taken in  $\text{CDCl}_3$  using a mixture of **probe-2** (ca. 1.5 mg) and **A**<sub>7</sub> (ca. 1.0 mg).



b) HPLC Traces corresponding to the samples described in Figure S2

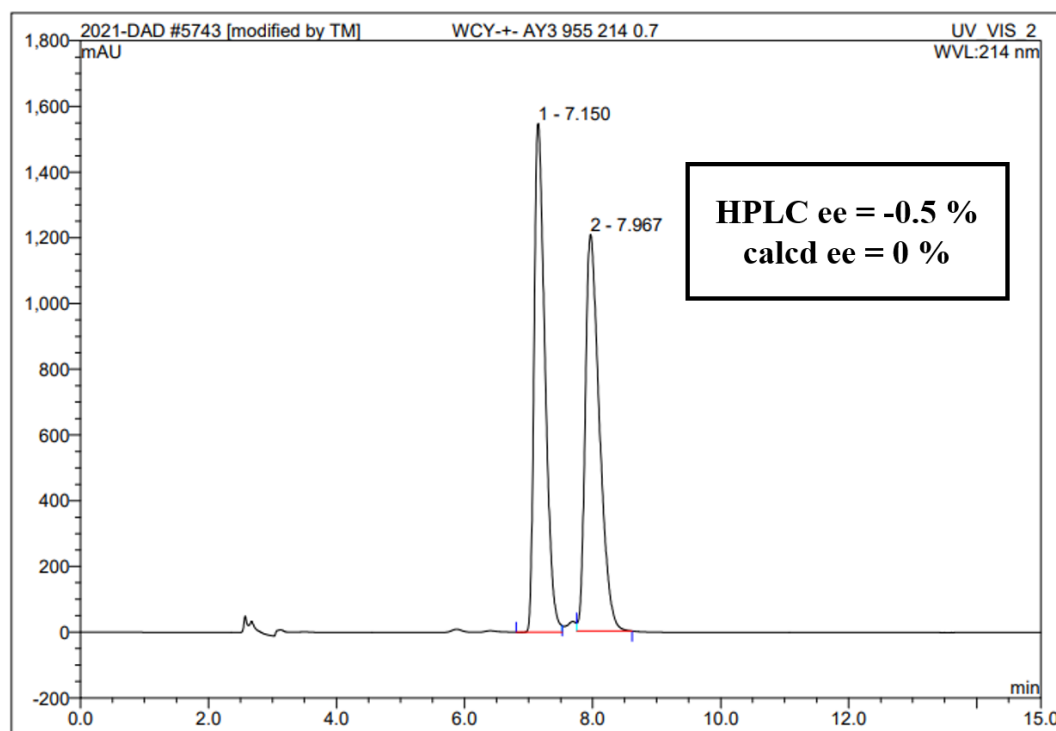

| No.           | Ret.Time<br>min | Peak Name | Height<br>mAU | Area<br>mAU*min | Rel.Area<br>% | Amount | Type |
|---------------|-----------------|-----------|---------------|-----------------|---------------|--------|------|
| 1             | 7.15            | n.a.      | 1548.312      | 305.917         | 49.75         | n.a.   | BM * |
| 2             | 7.97            | n.a.      | 1207.441      | 309.037         | 50.25         | n.a.   | MB*  |
| <b>Total:</b> |                 |           | 2755.753      | 614.954         | 100.00        | 0.000  |      |

**Figure S5.** Evaluation of the *ee* values of enantioenriched 1,2,3,4-tetrahydronaphthalene-1-carbonitrile (**A<sub>7</sub>**) via HPLC. HPLC analysis of Samples with different *ee* values: Chiralpak OJ-H column, hexane/isopropanol = 95/5; 0.7 mL/min; detected at 214 nm. Retention time ( $T_R$ ) for *R* and *S* enantiomers are 7.15 min (minor) and 7.97 min (major), and peak areas of *S* and *R* enantiomers are 49.75 % and 50.25 % respectively. The *ee* value measured by HPLC is -0.5 %.

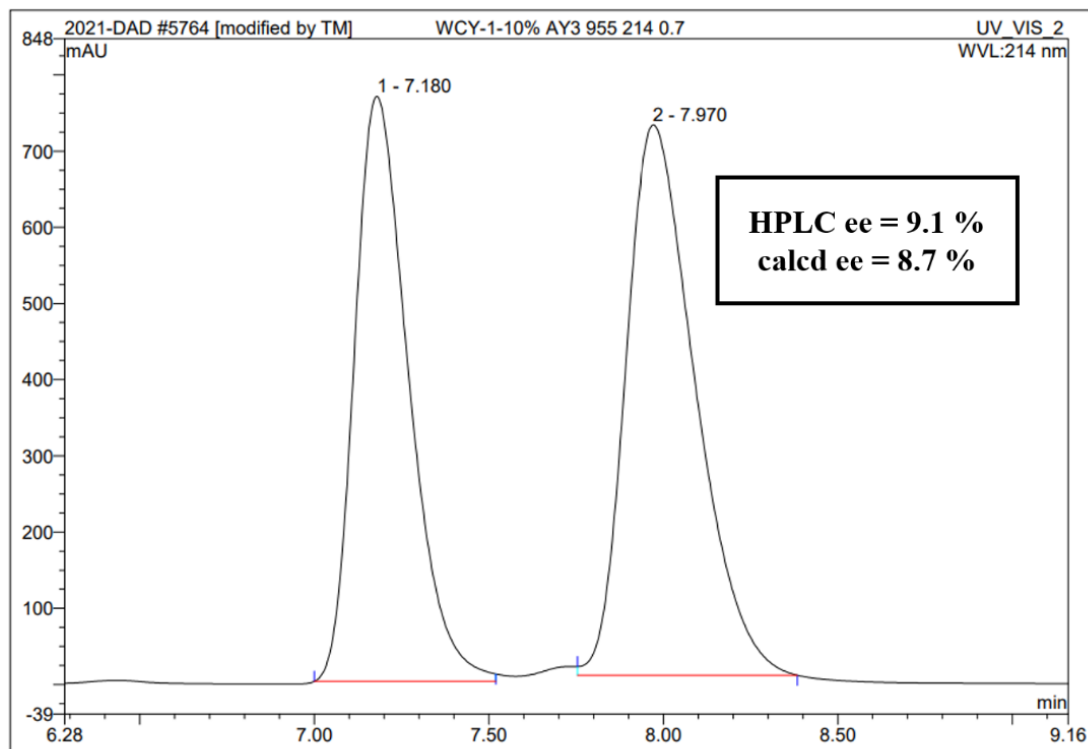

| No.           | Ret.Time<br>min | Peak Name | Height<br>mAU | Area<br>mAU*min | Rel.Area<br>% | Amount | Type |
|---------------|-----------------|-----------|---------------|-----------------|---------------|--------|------|
| 1             | 7.18            | n.a.      | 767.984       | 137.988         | 45.44         | n.a.   | BM * |
| 2             | 7.97            | n.a.      | 722.592       | 165.703         | 54.56         | n.a.   | MB*  |
| <b>Total:</b> |                 |           | 1490.576      | 303.691         | 100.00        | 0.000  |      |

**Figure S6.** Evaluation of the *ee* values of enantioenriched 1,2,3,4-tetrahydronaphthalene-1-carbonitrile (**A<sub>7</sub>**) via HPLC. HPLC analysis of Samples with different *ee* values: Chiralpak OJ-H column, hexane/isopropanol = 95/5; 0.7 mL/min; detected at 214 nm. Retention time (*T<sub>R</sub>*) for *R* and *S* enantiomers are 7.18 min (minor) and 7.97 min (major), and peak areas of *R* and *S* enantiomers are 45.44 % and 54.56 % respectively. The *ee* value measured by HPLC is 9.1 %.

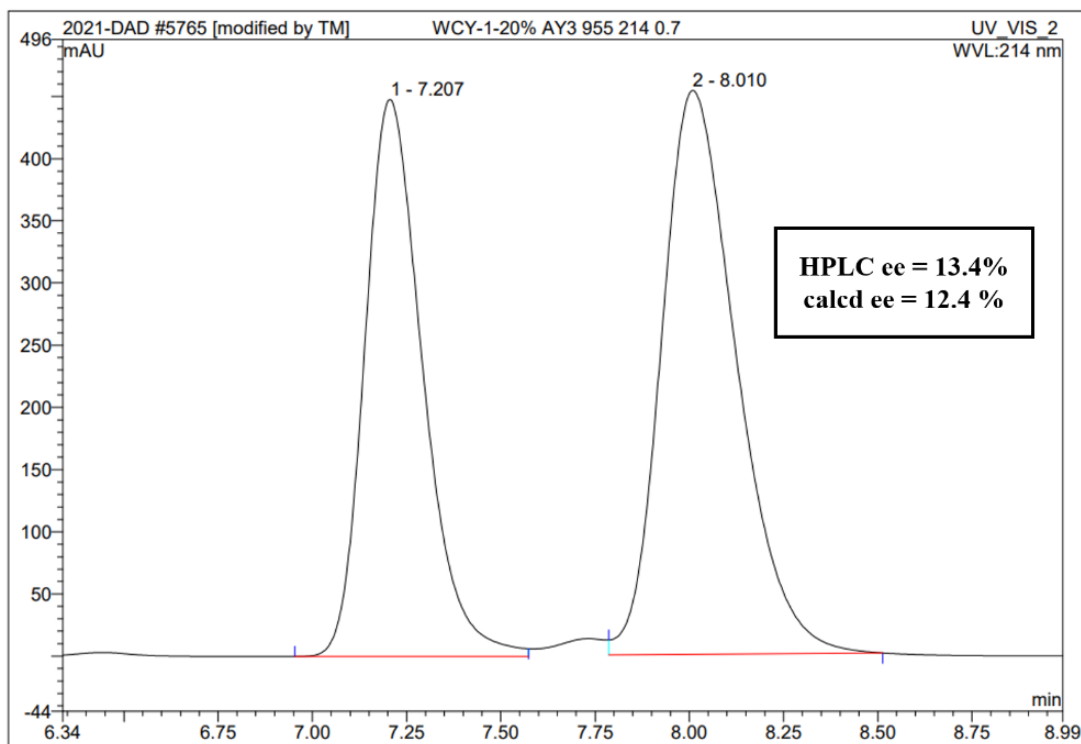

| No.           | Ret.Time<br>min | Peak Name | Height<br>mAU | Area<br>mAU*min | Rel.Area<br>% | Amount | Type |
|---------------|-----------------|-----------|---------------|-----------------|---------------|--------|------|
| 1             | 7.21            | n.a.      | 447.918       | 79.737          | 43.31         | n.a.   | BM * |
| 2             | 8.01            | n.a.      | 453.432       | 104.353         | 56.69         | n.a.   | MB*  |
| <b>Total:</b> |                 |           | 901.350       | 184.090         | 100.00        | 0.000  |      |

**Figure S7** Evaluation of the *ee* values of enantioenriched 1,2,3,4-tetrahydronaphthalene-1-carbonitrile (**A<sub>7</sub>**) via HPLC. HPLC analysis of Samples with different *ee* values: Chiralpak OJ-H column, hexane/isopropanol = 95/5; 0.7 mL/min; detected at 214 nm. Retention time ( $T_R$ ) for *R* and *S* enantiomers are 7.21 min (minor) and 8.01 min (major), and peak areas of *R* and *S* enantiomers are 43.31 % and 56.69 % respectively. The *ee* value measured by HPLC is 13.4 %.

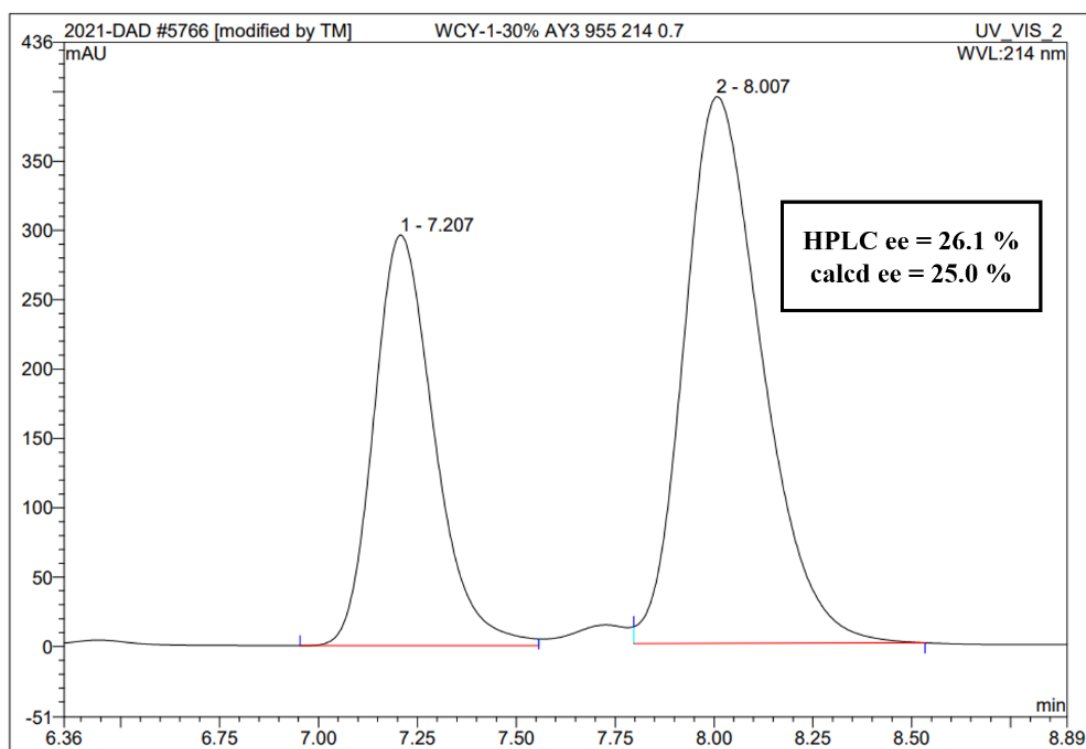

| No.           | Ret.Time<br>min | Peak Name | Height<br>mAU | Area<br>mAU*min | Rel.Area<br>% | Amount | Type |
|---------------|-----------------|-----------|---------------|-----------------|---------------|--------|------|
| 1             | 7.21            | n.a.      | 296.129       | 52.547          | 36.93         | n.a.   | BM * |
| 2             | 8.01            | n.a.      | 394.325       | 89.729          | 63.07         | n.a.   | MB*  |
| <b>Total:</b> |                 |           | 690.454       | 142.277         | 100.00        | 0.000  |      |

**Figure S8.** Evaluation of the *ee* values of enantioenriched 1,2,3,4-tetrahydronaphthalene-1-carbonitrile (**A<sub>7</sub>**) via HPLC. HPLC analysis of Samples with different *ee* values: Chiralpak OJ-H column, hexane/isopropanol = 95/5; 0.7 mL/min; detected at 214 nm. Retention time (*T<sub>R</sub>*) for *R* and *S* enantiomers are 7.21 min (minor) and 8.01 min (major), and peak areas of *R* and *S* enantiomers are 36.93 % and 63.07 % respectively. The *ee* value measured by HPLC is 26.1 %.

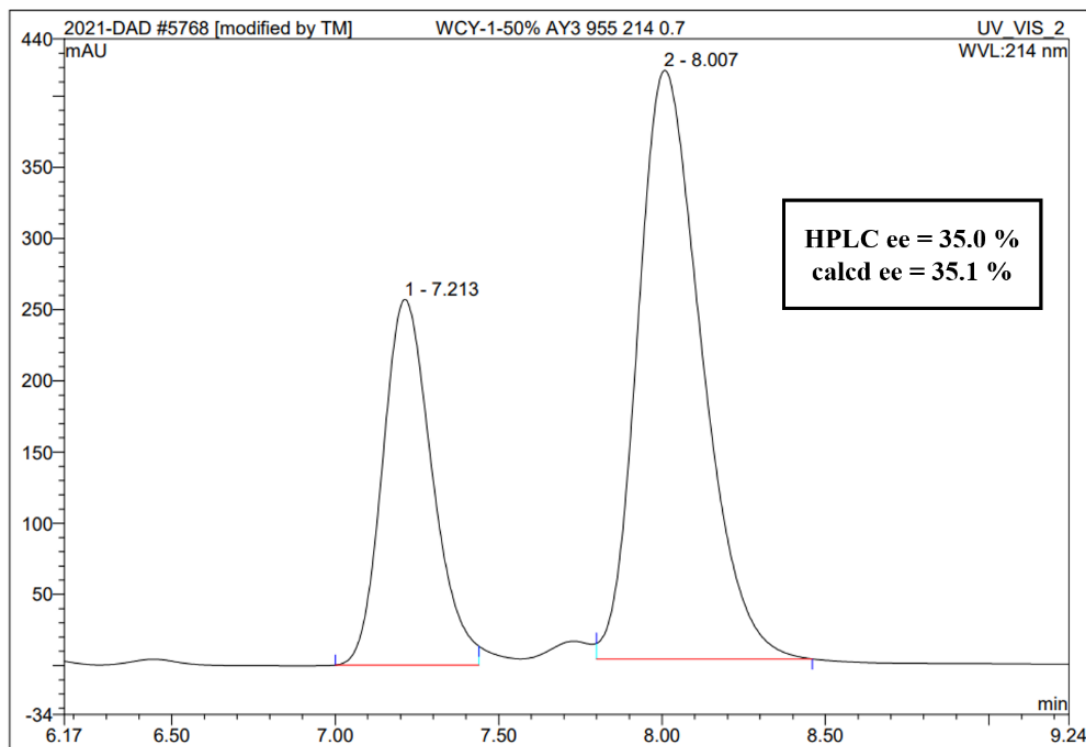

| No.           | Ret.Time<br>min | Peak Name | Height<br>mAU | Area<br>mAU*min | Rel.Area<br>% | Amount | Type |
|---------------|-----------------|-----------|---------------|-----------------|---------------|--------|------|
| 1             | 7.21            | n.a.      | 256.880       | 44.931          | 32.48         | n.a.   | BM * |
| 2             | 8.01            | n.a.      | 413.394       | 93.403          | 67.52         | n.a.   | MB*  |
| <b>Total:</b> |                 |           | 670.275       | 138.334         | 100.00        | 0.000  |      |

**Figure S9.** Evaluation of the *ee* values of enantioenriched 1,2,3,4-tetrahydronaphthalene-1-carbonitrile (**A<sub>7</sub>**) via HPLC. HPLC analysis of Samples with different *ee* values: Chiralpak OJ-H column, hexane/isopropanol = 95/5; 0.7 mL/min; detected at 214 nm. Retention time ( $T_R$ ) for *R* and *S* enantiomers are 7.21 min (minor) and 8.01 min (major), and peak areas of *R* and *S* enantiomers are 32.48 % and 67.52 % respectively. The *ee* value measured by HPLC is 35.0 %.

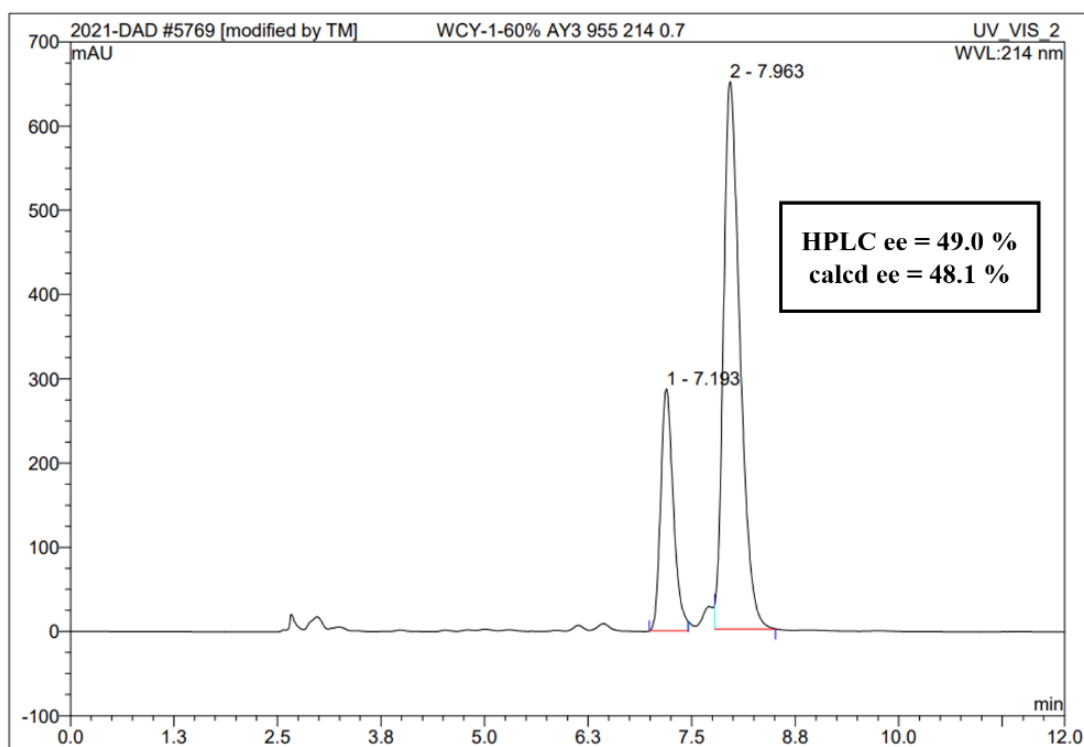

| No.           | Ret.Time<br>min | Peak Name | Height<br>mAU | Area<br>mAU*min | Rel.Area<br>% | Amount | Type |
|---------------|-----------------|-----------|---------------|-----------------|---------------|--------|------|
| 1             | 7.19            | n.a.      | 287.270       | 51.039          | 25.26         | n.a.   | BM * |
| 2             | 7.96            | n.a.      | 649.612       | 151.009         | 74.74         | n.a.   | MB*  |
| <b>Total:</b> |                 |           | 936.882       | 202.048         | 100.00        | 0.000  |      |

**Figure S10.** Evaluation of the *ee* values of enantioenriched 1,2,3,4-tetrahydronaphthalene-1-carbonitrile (**A<sub>7</sub>**) via HPLC. HPLC analysis of Samples with different *ee* values: Chiralpak OJ-H column, hexane/isopropanol = 95/5; 0.7 mL/min; detected at 214 nm. Retention time ( $T_R$ ) for *R* and *S* enantiomers are 7.19 min (minor) and 7.96 min (major), and peak areas of *R* and *S* enantiomers are 25.26 % and 74.74 % respectively. The *ee* value measured by HPLC is 49.0 %.

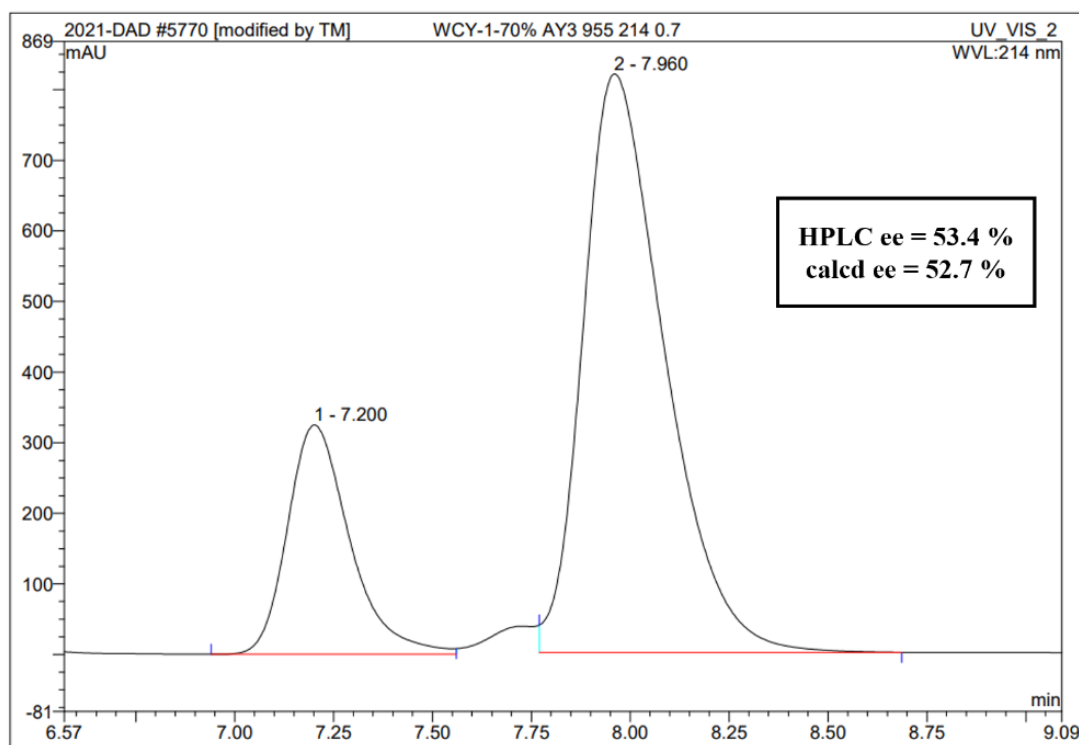

| No.           | Ret.Time<br>min | Peak Name | Height<br>mAU | Area<br>mAU*min | Rel.Area<br>% | Amount | Type |
|---------------|-----------------|-----------|---------------|-----------------|---------------|--------|------|
| 1             | 7.20            | n.a.      | 324.873       | 59.497          | 23.29         | n.a.   | BM * |
| 2             | 7.96            | n.a.      | 819.410       | 195.914         | 76.71         | n.a.   | MB*  |
| <b>Total:</b> |                 |           | 1144.284      | 255.411         | 100.00        | 0.000  |      |

**Figure S11.** Evaluation of the *ee* values of enantioenriched 1,2,3,4-tetrahydronaphthalene-1-carbonitrile (**A<sub>7</sub>**) via HPLC. HPLC analysis of Samples with different *ee* values: Chiralpak OJ-H column, hexane/isopropanol = 95/5; 0.7 mL/min; detected at 214 nm. Retention time ( $T_R$ ) for *R* and *S* enantiomers are 7.20 min (minor) and 7.96 min (major), and peak areas of *R* and *S* enantiomers are 23.29 % and 76.71 % respectively. The *ee* value measured by HPLC is 53.4 %.

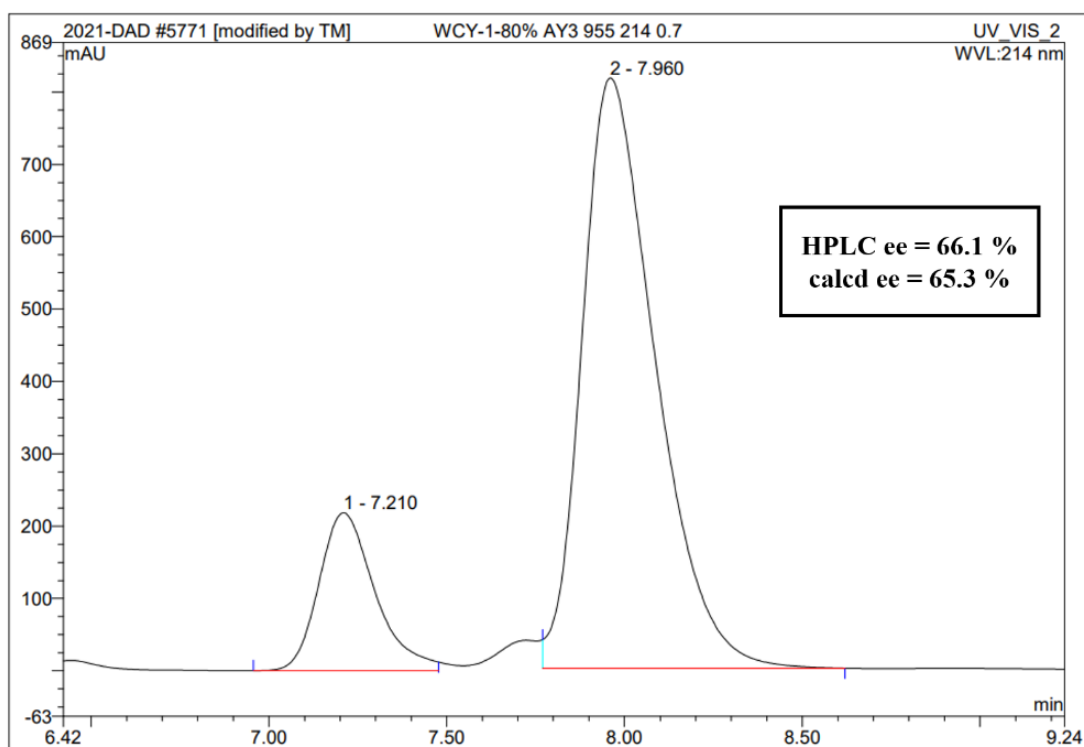

| No.           | Ret.Time<br>min | Peak Name | Height<br>mAU | Area<br>mAU*min | Rel.Area<br>% | Amount | Type |
|---------------|-----------------|-----------|---------------|-----------------|---------------|--------|------|
| 1             | 7.21            | n.a.      | 218.361       | 39.806          | 16.96         | n.a.   | BM * |
| 2             | 7.96            | n.a.      | 815.846       | 194.966         | 83.04         | n.a.   | MB*  |
| <b>Total:</b> |                 |           | 1034.208      | 234.772         | 100.00        | 0.000  |      |

**Figure S12.** Evaluation of the *ee* values of enantioenriched 1,2,3,4-tetrahydronaphthalene-1-carbonitrile (**A<sub>7</sub>**) via HPLC. HPLC analysis of Samples with different *ee* values: Chiralpak OJ-H column, hexane/isopropanol = 95/5; 0.7 mL/min; detected at 214 nm. Retention time (*T<sub>R</sub>*) for *R* and *S* enantiomers are 7.21 min (minor) and 7.96 min (major), and peak areas of *R* and *S* enantiomers are 16.96 % and 83.04 % respectively. The *ee* value measured by HPLC is 66.1 %.



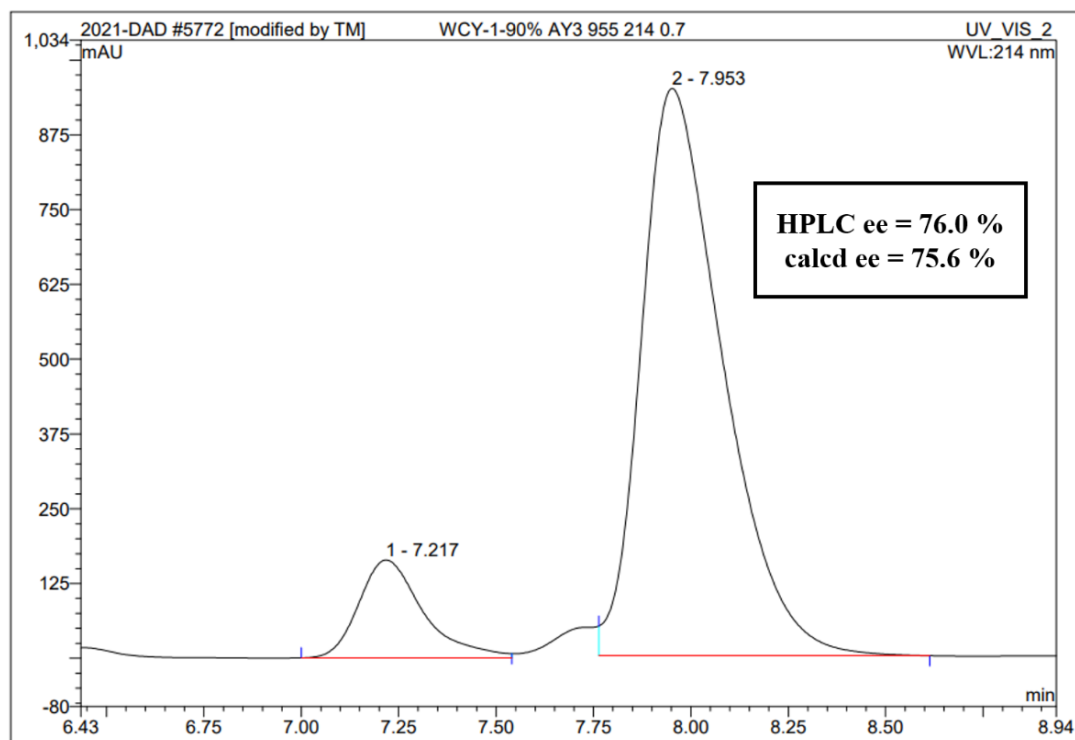

| No.           | Ret.Time<br>min | Peak Name | Height<br>mAU | Area<br>mAU*min | Rel.Area<br>% | Amount | Type |
|---------------|-----------------|-----------|---------------|-----------------|---------------|--------|------|
| 1             | 7.22            | n.a.      | 164.007       | 31.312          | 12.01         | n.a.   | BM * |
| 2             | 7.95            | n.a.      | 948.379       | 229.398         | 87.99         | n.a.   | MB*  |
| <b>Total:</b> |                 |           | 1112.386      | 260.709         | 100.00        | 0.000  |      |

**Figure S13.** Evaluation of the *ee* values of enantioenriched 1,2,3,4-tetrahydronaphthalene-1-carbonitrile (**A<sub>7</sub>**) via HPLC. HPLC analysis of Samples with different *ee* values: Chiralpak OJ–H column, hexane/isopropanol = 95/5; 0.7 mL/min; detected at 214 nm. Retention time ( $T_R$ ) for *R* and *S* enantiomers are 7.22 min (minor) and 7.95 min (major), and peak areas of *R* and *S* enantiomers are 12.01 % and 87.99 % respectively. The *ee* value measured by HPLC is 76.0 %.

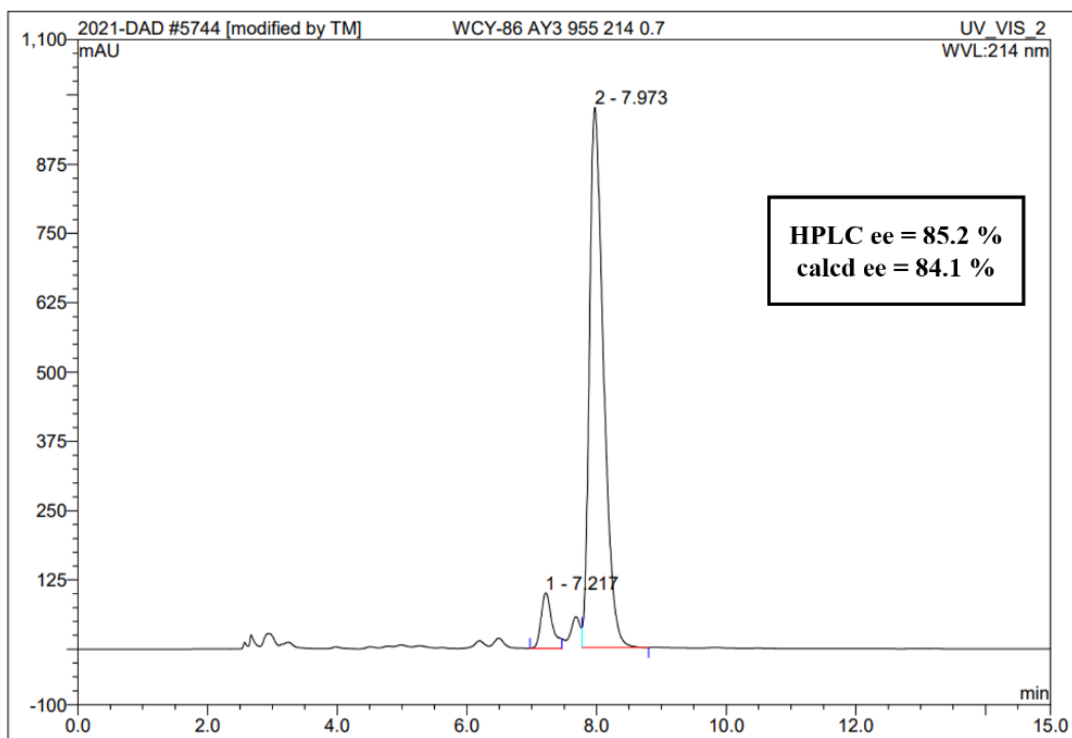

| No.           | Ret.Time<br>min | Peak Name | Height<br>mAU | Area<br>mAU*min | Rel.Area<br>% | Amount | Type |
|---------------|-----------------|-----------|---------------|-----------------|---------------|--------|------|
| 1             | 7.22            | n.a.      | 99.892        | 19.571          | 7.39          | n.a.   | BM * |
| 2             | 7.97            | n.a.      | 974.365       | 245.215         | 92.61         | n.a.   | MB*  |
| <b>Total:</b> |                 |           | 1074.257      | 264.786         | 100.00        | 0.000  |      |

**Figure S14.** Evaluation of the *ee* values of enantioenriched 1,2,3,4-tetrahydronaphthalene-1-carbonitrile (**A<sub>7</sub>**) via HPLC. HPLC analysis of Samples with different *ee* values: Chiralpak OJ–H column, hexane/isopropanol = 95/5; 0.7 mL/min; detected at 214 nm. Retention time ( $T_R$ ) for *R* and *S* enantiomers are 7.22 min (minor) and 7.97 min (major), and peak areas of *R* and *S* enantiomers are 7.39 % and 92.61 % respectively. The *ee* value measured by HPLC is 85.2 %.

## Differentiation of Chiral Amines Using Probe-2

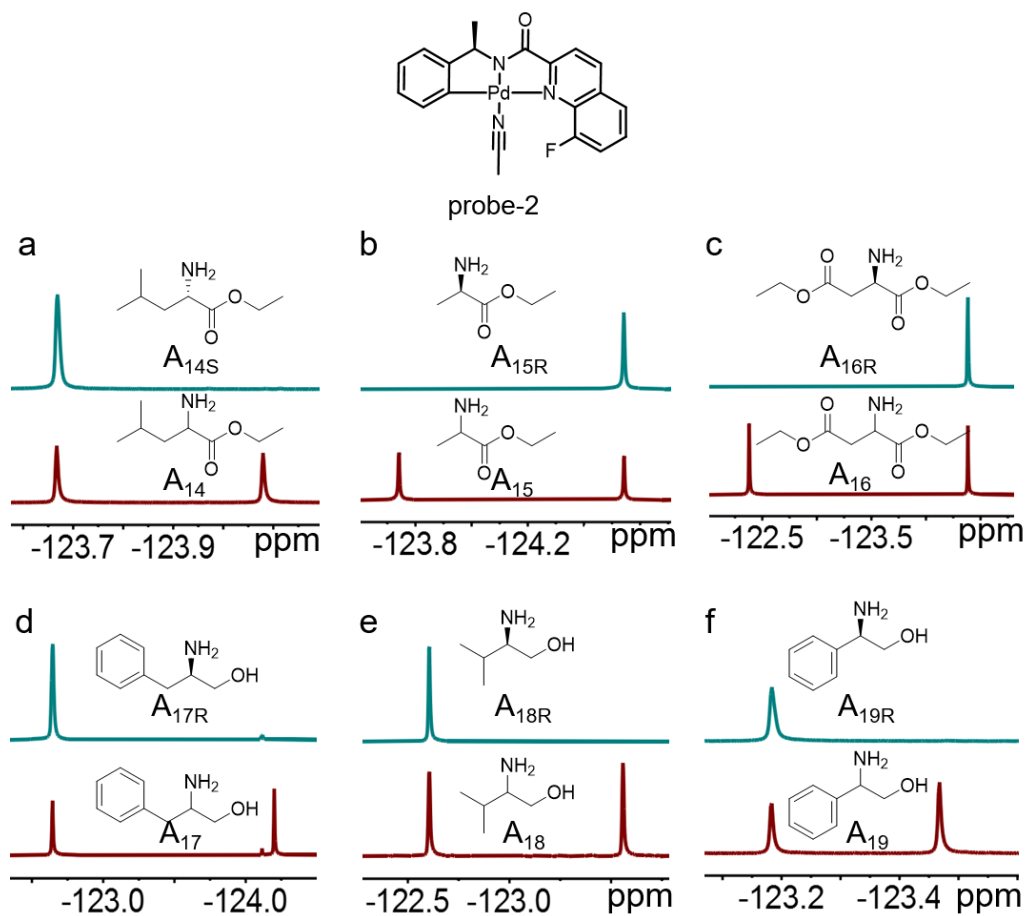

**Figure S15.** Detection of racemic amine using **probe-2** (a-f).  $^1\text{H}$ -decoupled  $^{19}\text{F}$  NMR spectra of mixtures of **probe-2** (1.5 mg), various racemic analytes and enantiopure (0.3–0.6 mg) in  $\text{CDCl}_3$ ; The red chromatogram represents the racemic analyte, the green chromatogram represents the analyte in the single configuration. Spectra were recorded on a Bruker Avance-600 NMR spectrometer using a scan number of 64.

## Evaluation of Enantiomeric Excess Values of Crude Reaction Product

Under a nitrogen atmosphere, an oven-dried 25 mL Schlenk tube was charged with  $\text{Cu}(\text{acac})_2$  (7.6 mg, 0.029 mmol, 10 mol%), chiral ligand **L1/L2** (0.043 mmol, 15 mol%) and 1.0 mL of solvent (DMF was used in conditions using ligand **L1**, and acetone was used for conditions using ligand **L2**). After stirring at room temperature for 5 minutes, the 2-(4-isobutylphenyl)propanoic acid (60 mg, 0.29 mmol),  $\text{PhI}=\text{O}$  (128 mg, 0.58 mmol, 2.0 equiv),  $\text{K}_2\text{HPO}_4 \cdot 3\text{H}_2\text{O}$  (76 mg, 0.44 mmol, 1.5 equiv),  $\text{TMSCN}$  (57 mg, 0.58 mmol, 2.0 equiv), and 4 mL of solvent were added and the resulting solution was stirred at 30 °C in oil bath for 15 h. Taking 0.5 mL of the reaction solution, extracted with  $\text{EtOAc}/\text{H}_2\text{O}$ , removing the solvent under vacuum, and then mixing it with 1.5 mg of the **probe-3** in 0.5 mL of  $\text{CDCl}_3$ . The solution was filtered through a syringe filter (0.22  $\mu\text{m}$ ) before  $^{19}\text{F}$  NMR analysis. The spectra were recorded on a Bruker Avance-600 NMR neo spectrometer (32 scans). Enantiomeric excess values determined based on the integrations of the  $^{19}\text{F}$  NMR signals corresponding to the enantiomers.

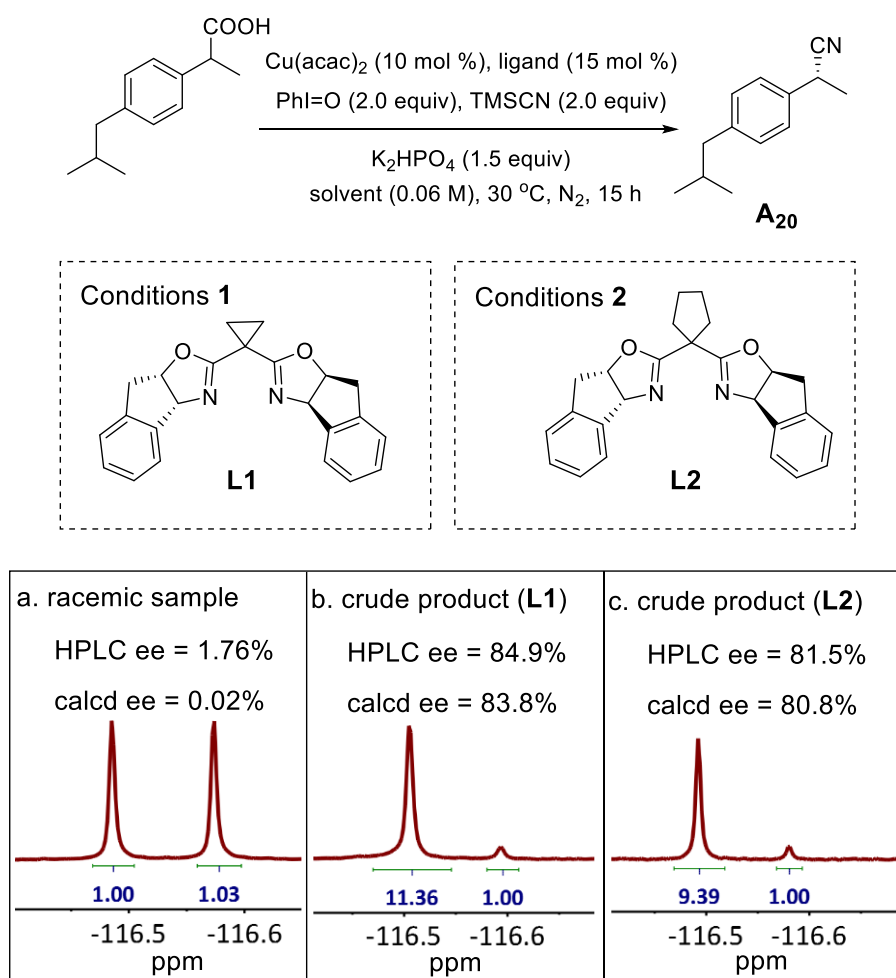

**Figure S16.** Evaluation of the enantioselectivity of an asymmetric cyanation reaction using **probe-2**. (a)  $^1\text{H}$ -decoupled  $^{19}\text{F}$  NMR spectrum of a mixture of **probe-2** (1.5 mg) and racemic **A**<sub>20</sub> (ca. 1.0 mg) in  $\text{CDCl}_3$ . (b, c)  $^1\text{H}$ -decoupled  $^{19}\text{F}$  NMR spectra of mixtures of **probe-2** (1.5 mg) and crude reaction products obtained under different conditions (conditions 1: ligand **L1** was used with DMF serving as the solvent; conditions 2: ligand **L2** was used with acetone serving as the solvent).

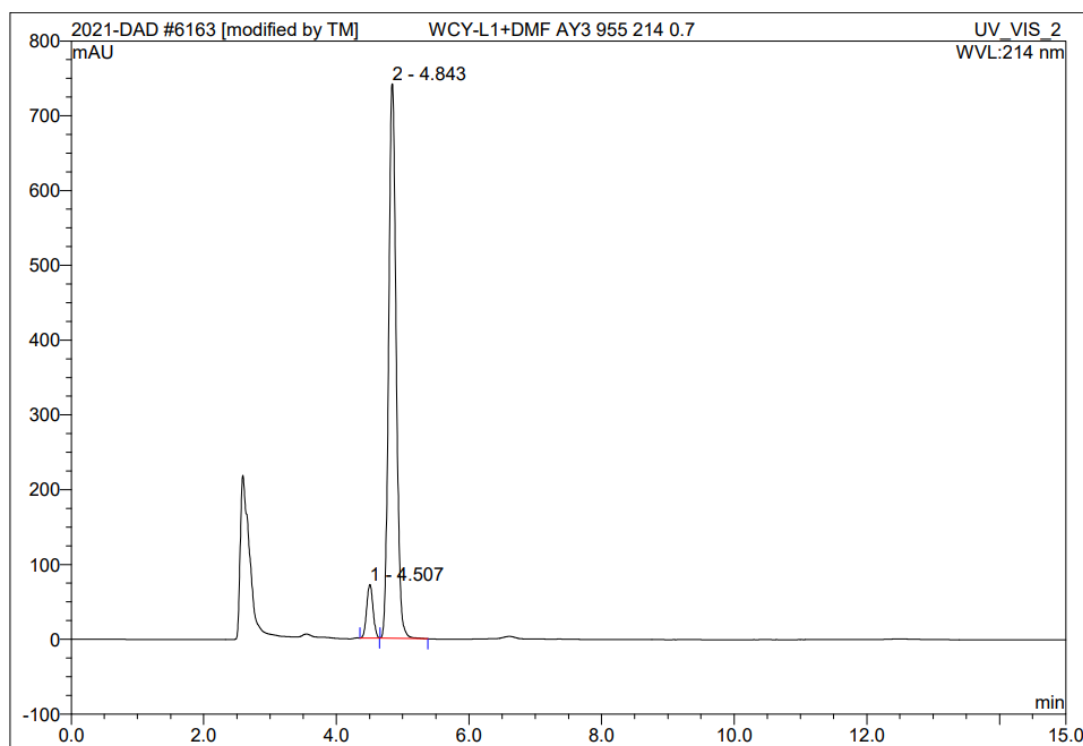

| No.           | Ret.Time<br>min | Peak Name | Height<br>mAU | Area<br>mAU*min | Rel.Area<br>% | Amount | Type |
|---------------|-----------------|-----------|---------------|-----------------|---------------|--------|------|
| 1             | 4.51            | n.a.      | 71.693        | 7.951           | 7.53          | n.a.   | BMB  |
| 2             | 4.84            | n.a.      | 741.688       | 97.577          | 92.47         | n.a.   | BMB  |
| <b>Total:</b> |                 |           | 813.381       | 105.528         | 100.00        | 0.000  |      |

**Figure S17.** HPLC analysis of reaction mixture under the reaction conditions using ligand **L1** with DMF serving as the solvent. HPLC analysis of Samples with different *ee* values: Chiralpak OJ–H column, hexane/isopropanol = 95/5; 0.7 mL/min; detected at 214 nm. Retention time ( $T_R$ ) for *S* and *R* enantiomers are 4.51 min (minor) and 4.84 min (major), and peak areas of *R* and *S* enantiomers are 92.47 % and 7.53 % respectively. The *ee* value measured by HPLC is 84.9 %.

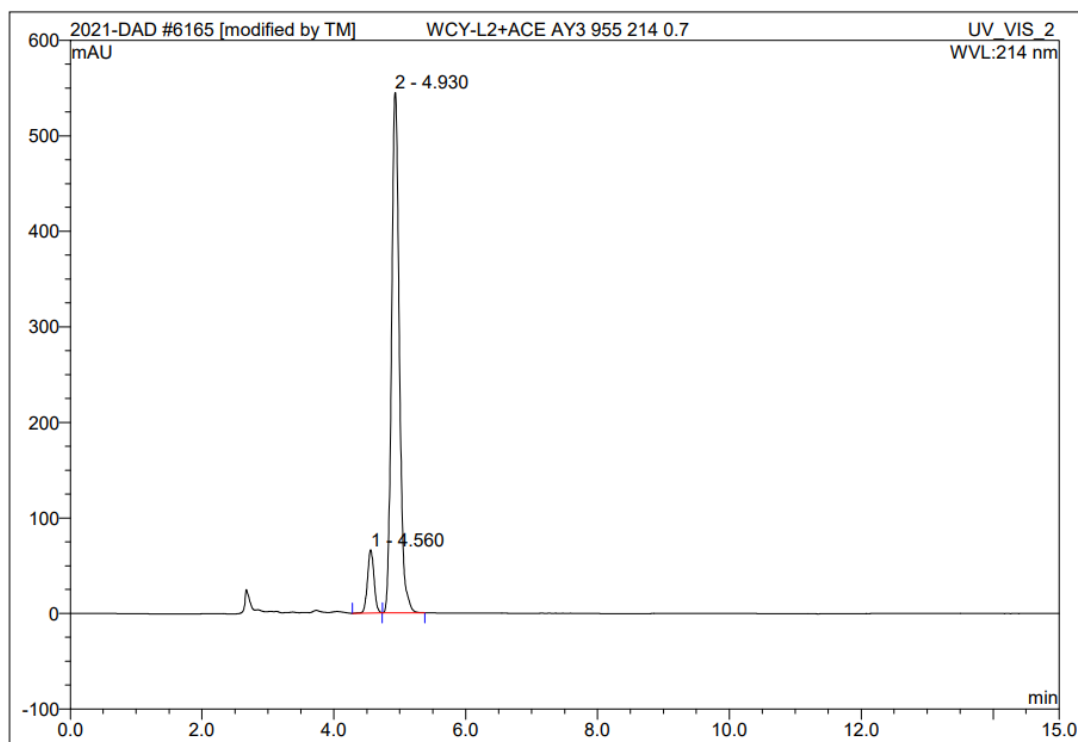

| No.           | Ret.Time<br>min | Peak Name | Height<br>mAU | Area<br>mAU*min | Rel.Area<br>% | Amount | Type |
|---------------|-----------------|-----------|---------------|-----------------|---------------|--------|------|
| 1             | 4.56            | n.a.      | 66.517        | 7.607           | 9.25          | n.a.   | BMB  |
| 2             | 4.93            | n.a.      | 544.610       | 74.633          | 90.75         | n.a.   | BMB  |
| <b>Total:</b> |                 |           | 611.127       | 82.240          | 100.00        | 0.000  |      |

**Figure S18.** HPLC analysis of reaction mixture under the reaction conditions using ligand **L2** with acetone serving as the solvent. HPLC analysis of Samples with different *ee* values: Chiralpak OJ-H column, hexane/isopropanol = 95/5; 0.7 mL/min; detected at 214 nm. Retention time ( $T_R$ ) for *S* and *R* enantiomers are 4.56 min (minor) and 4.93 min (major), and peak areas of *R* and *S* enantiomers are 90.75 % and 9.25 % respectively. The *ee* value measured by HPLC is 81.5 %.

## Evaluation of Influence of the Presence of Ligand L1/L2 on Chiral Discrimination of Nitriles.

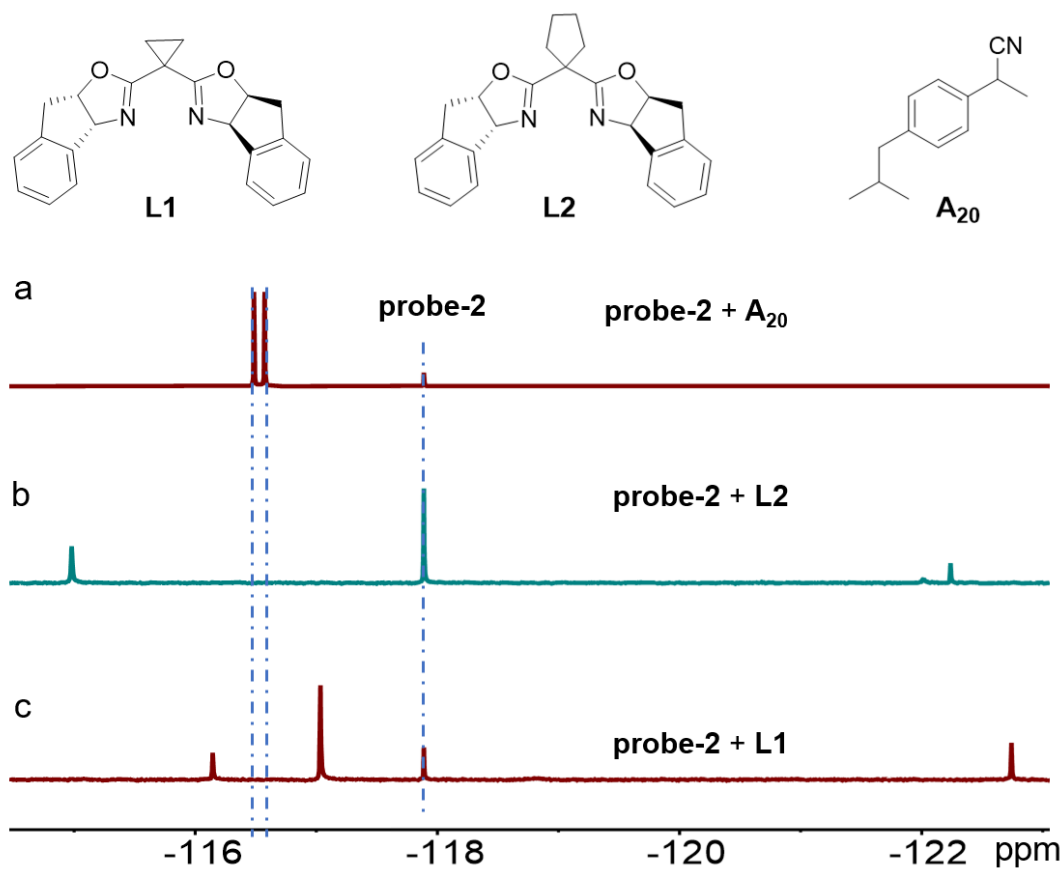

**Figure S19.** Evaluation of influence of the presence of ligand **L1/L2** on chiral discrimination of nitriles. (a) <sup>1</sup>H-decoupled <sup>19</sup>F NMR spectrum of a mixture of **probe-2** (1.5 mg) and racemic **A<sub>20</sub>** (ca. 1.0 mg) in CDCl<sub>3</sub>. (b,c) <sup>1</sup>H-decoupled <sup>19</sup>F NMR spectra of mixtures of **probe-2** (1.5 mg), **L1** or **L2** (0.6 mg) in CDCl<sub>3</sub>.

## Comparison Between the Performance of Probe-2 and Probe-3 Both Labeled with a $^{19}\text{F}$ Atom.

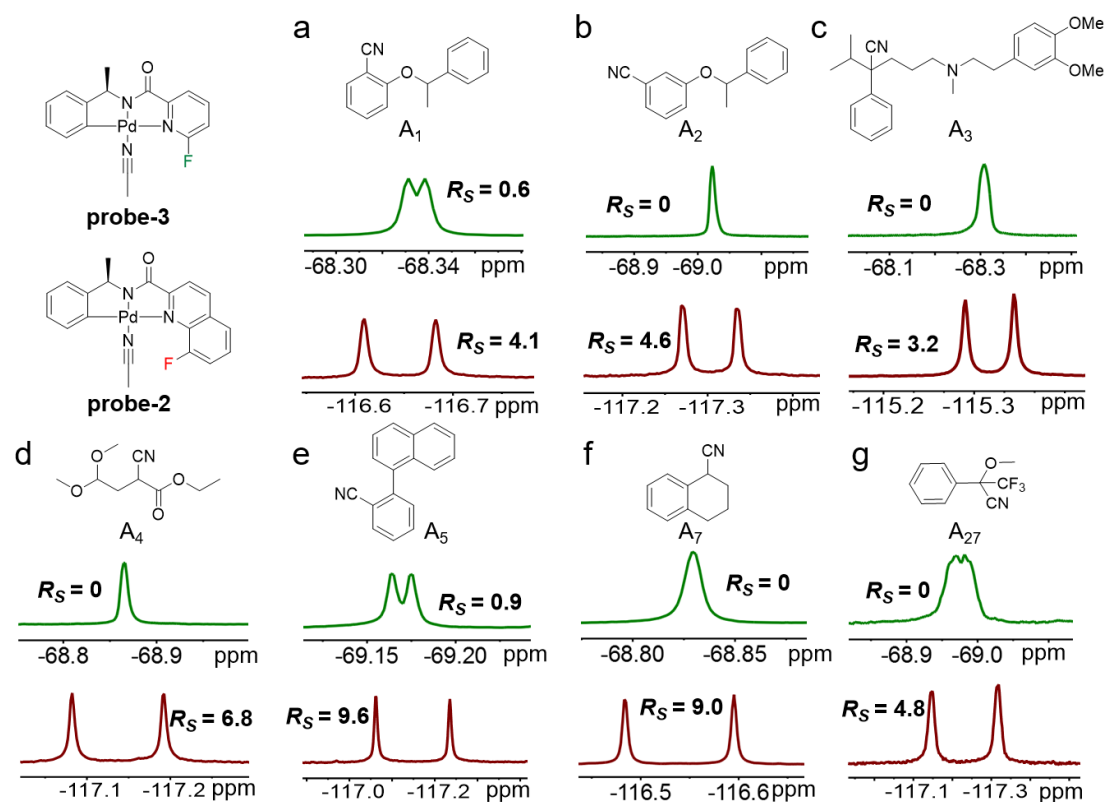

**Figure S20.** (a-g)  $^{19}\text{F}\{^1\text{H}\}$  NMR spectra of mixtures containing  $^{19}\text{F}$ -labeled probes and various analytes dissolved in  $\text{CDCl}_3$ .  $^{19}\text{F}\{^1\text{H}\}$  NMR spectra associated with **probe-3** are presented in deep green and were obtained using **probe-3** (0.6 mg) and analytes (0.6–1.5 mg) in  $\text{CDCl}_3$ , while those corresponding to **probe-2** are presented in dark red and were obtained using **probe-2** (1.5 mg) and analytes (0.6–1.5 mg) in  $\text{CDCl}_3$ . All  $^{19}\text{F}$  NMR measurements were conducted using a Bruker Avance Neo 600 MHz (565 MHz for the  $^{19}\text{F}$  nucleus) NMR spectrometer, with each spectrum obtained from 32 scans.



## Determination of the Degree of Twisting by DFT Calculations

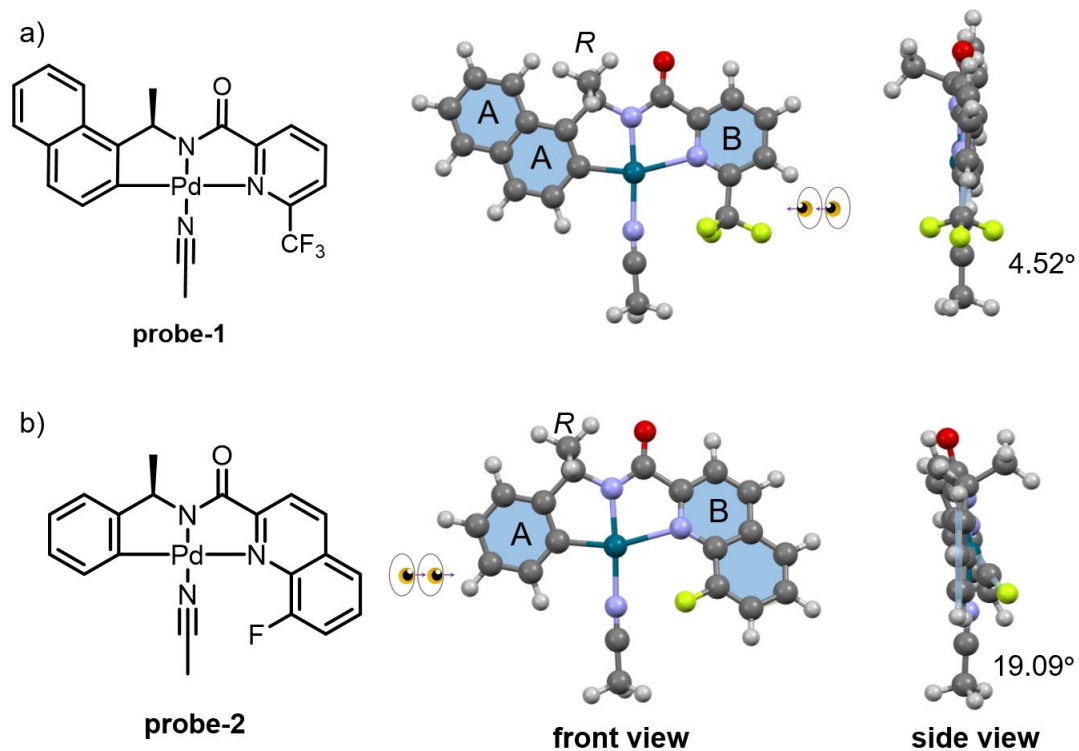

Figure S21. Optimized structures of **probe-2** or **probe-1** through DFT calculation.

### probe-2

|    |          |          |          |
|----|----------|----------|----------|
| Pd | 0.23803  | -0.49931 | 0.27668  |
| O  | -1.77288 | 2.32063  | 2.41519  |
| N  | -0.44031 | 0.54737  | 1.80029  |
| N  | -0.36529 | 1.48481  | -0.73806 |
| N  | 0.81420  | -1.74027 | -1.27780 |
| H  | 1.12143  | -3.56412 | 0.51900  |
| H  | 1.24320  | -5.10589 | 2.43363  |
| H  | 0.61481  | -4.32607 | 4.70710  |
| H  | -2.65553 | 3.56111  | 0.55363  |
| H  | -2.79707 | 4.30598  | -1.85622 |
| H  | -0.12652 | -1.98841 | 5.04574  |
| H  | -1.34193 | 0.04257  | 3.61430  |
| H  | 1.62660  | 0.77694  | 3.54480  |
| H  | 0.70634  | 0.37309  | 5.01160  |
| H  | 0.28787  | 1.82916  | 4.08025  |
| H  | 1.37844  | 1.42437  | -4.92535 |
| H  | -0.28004 | 3.10644  | -5.75715 |
| H  | -1.90631 | 4.10956  | -4.18140 |
| H  | 0.55647  | -3.66449 | -3.76450 |

|   |          |          |          |
|---|----------|----------|----------|
| H | 2.08189  | -4.09216 | -2.95118 |
| H | 2.01397  | -2.67210 | -4.02452 |
| F | 1.52530  | 0.57146  | -2.52597 |
| C | 0.43044  | -1.88606 | 1.68454  |
| C | 0.84727  | -3.20496 | 1.50601  |
| C | 0.91692  | -4.08065 | 2.58856  |
| C | 0.56689  | -3.64465 | 3.86244  |
| C | 0.15101  | -2.33087 | 4.05107  |
| C | 0.07954  | -1.44669 | 2.97560  |
| C | -0.34968 | -0.01169 | 3.14501  |
| C | -1.15478 | 1.64944  | 1.58394  |
| C | -1.16744 | 2.08618  | 0.12668  |
| C | -2.04614 | 3.13276  | -0.23310 |
| C | -2.10605 | 3.53083  | -1.53617 |
| C | -1.23466 | 2.94482  | -2.48966 |
| C | -0.34840 | 1.93654  | -2.02599 |
| C | 0.63228  | 0.79463  | 4.00321  |
| C | 0.59952  | 1.43509  | -2.95606 |
| C | 0.62461  | 1.83547  | -4.26292 |
| C | -0.30490 | 2.79512  | -4.71814 |
| C | -1.20787 | 3.34780  | -3.84811 |
| C | 1.09167  | -2.42049 | -2.16375 |
| C | 1.45714  | -3.26332 | -3.29322 |

**probe-1**

|    |          |          |          |
|----|----------|----------|----------|
| Pd | 0.17206  | -0.11406 | -0.93792 |
| O  | 3.14301  | 1.64095  | 1.26191  |
| N  | 1.22111  | 0.57819  | 0.57650  |
| N  | 2.11849  | 0.56419  | -1.98812 |
| N  | -1.00830 | -0.90534 | -2.44162 |
| H  | -2.85918 | -1.04291 | -0.70344 |
| H  | -4.44343 | -1.10537 | 1.16526  |
| H  | 4.65899  | 2.16818  | -0.51084 |
| H  | 5.52696  | 2.16379  | -2.89535 |
| H  | 0.80162  | 1.37738  | 2.45765  |
| H  | 1.37790  | -1.60908 | 2.11549  |
| H  | 1.03631  | -0.83589 | 3.67556  |
| H  | 2.49914  | -0.38331 | 2.76795  |
| H  | 4.11231  | 1.07474  | -4.65324 |
| H  | -3.06240 | -1.22185 | -4.81393 |
| H  | -2.83051 | -2.85348 | -4.13480 |
| H  | -1.61172 | -2.16524 | -5.23861 |

|   |          |          |          |
|---|----------|----------|----------|
| H | -4.96921 | -0.69710 | 3.52617  |
| H | -4.28776 | 0.06458  | 5.77480  |
| H | -1.96158 | 0.87182  | 6.15800  |
| H | -0.33753 | 0.88884  | 4.33459  |
| F | 2.28747  | -0.11469 | -5.48986 |
| F | 0.53271  | 0.55037  | -4.42167 |
| F | 1.41916  | -1.37257 | -3.96430 |
| C | -1.19513 | -0.31533 | 0.48747  |
| C | -2.53115 | -0.73873 | 0.28470  |
| C | -3.42095 | -0.77069 | 1.32583  |
| C | -3.03418 | -0.35687 | 2.62540  |
| C | -1.69646 | 0.07834  | 2.84409  |
| C | -0.77579 | 0.06825  | 1.75178  |
| C | 0.67861  | 0.42594  | 1.92337  |
| C | 2.41093  | 1.14595  | 0.40012  |
| C | 2.88003  | 1.14152  | -1.04511 |
| C | 4.11111  | 1.72654  | -1.33499 |
| C | 4.57286  | 1.71547  | -2.63800 |
| C | 3.79148  | 1.11302  | -3.62044 |
| C | 2.57973  | 0.55533  | -3.24513 |
| C | 1.44886  | -0.67088 | 2.67580  |
| C | -1.60504 | -1.36194 | -3.31375 |
| C | 1.69833  | -0.10040 | -4.28415 |
| C | -2.32345 | -1.93552 | -4.44151 |
| C | -3.95263 | -0.35633 | 3.70811  |
| C | -3.57543 | 0.06753  | 4.95503  |
| C | -2.25451 | 0.52120  | 5.17262  |
| C | -1.34283 | 0.52544  | 4.14857  |

## References

1. Gu, G.; Yue, Y.; Wang, C.; Zhang, W.; Wu, J.; Li, Y.; Zhao, Chiral Discrimination of Nitrile Compounds Using a  $^{19}\text{F}$ -Labeled Palladium Probe. *Org. Lett.* **2023**, *25*, 4819–4824.
2. Gu, G.; Zhao, C.; Zhang, W.; Weng, J.; Xu, Z.; Wu, J.; Xie, Y.; He, X.; Zhao, Y. Chiral Discrimination of Acyclic Secondary Amines by  $^{19}\text{F}$  NMR. *Anal. Chem.* **2024**, *96*, 730–736.
3. *Spartan' 20*, Wavefunction, Inc. Irvine, CA

# $^1\text{H}$ , $^{19}\text{F}$ , and $^{13}\text{C}\{^1\text{H}\}$ NMR Spectra of All New Compounds

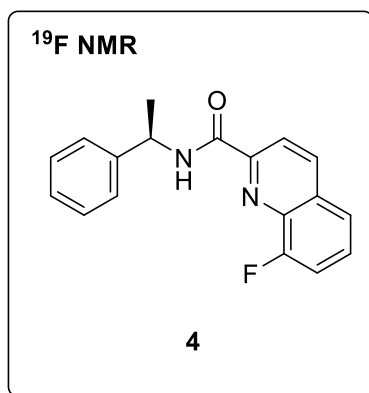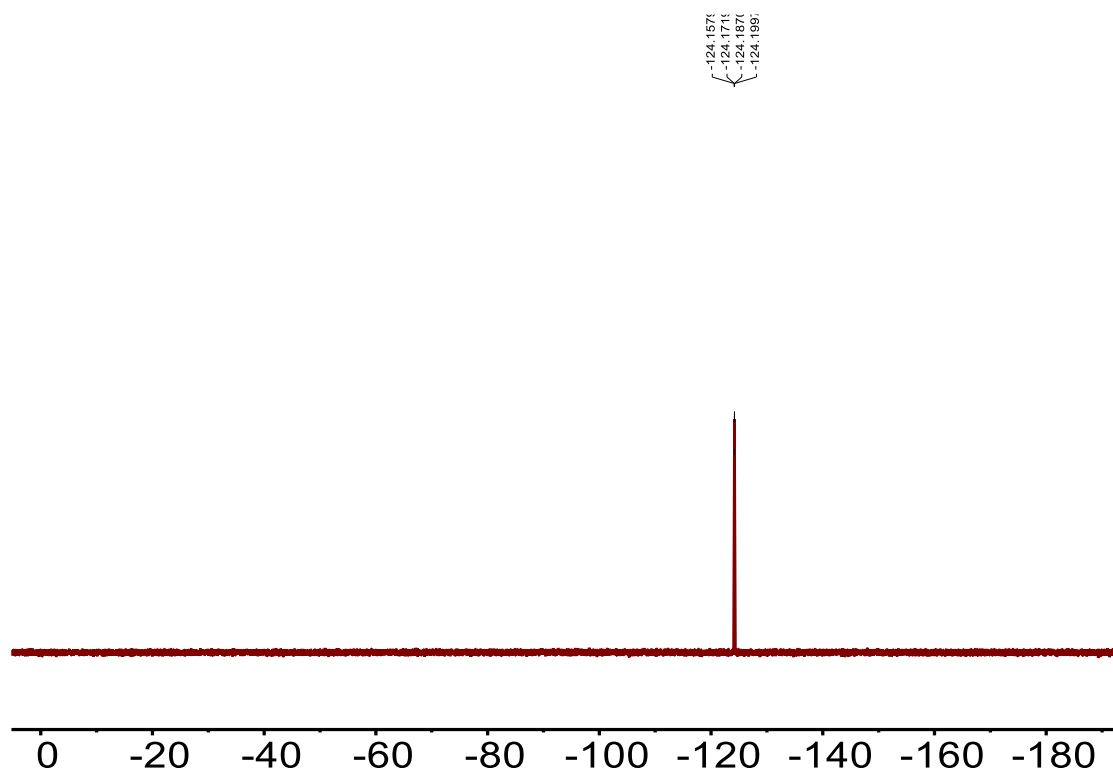

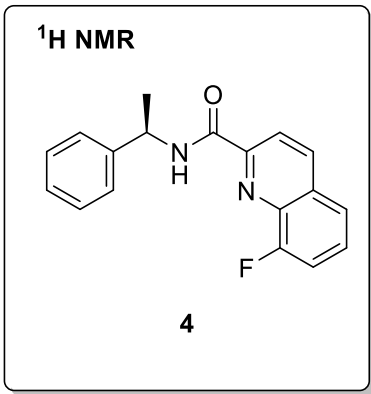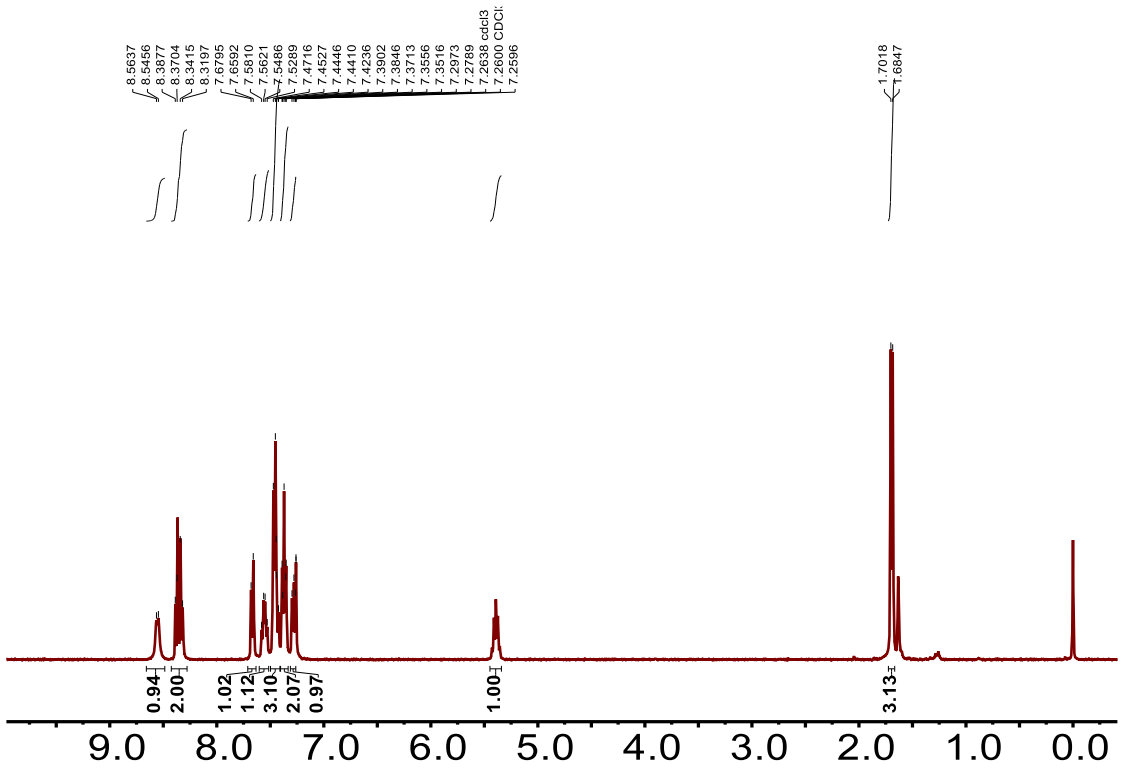

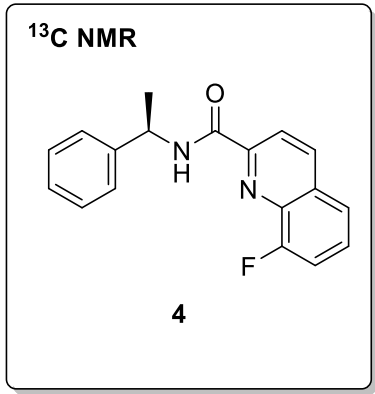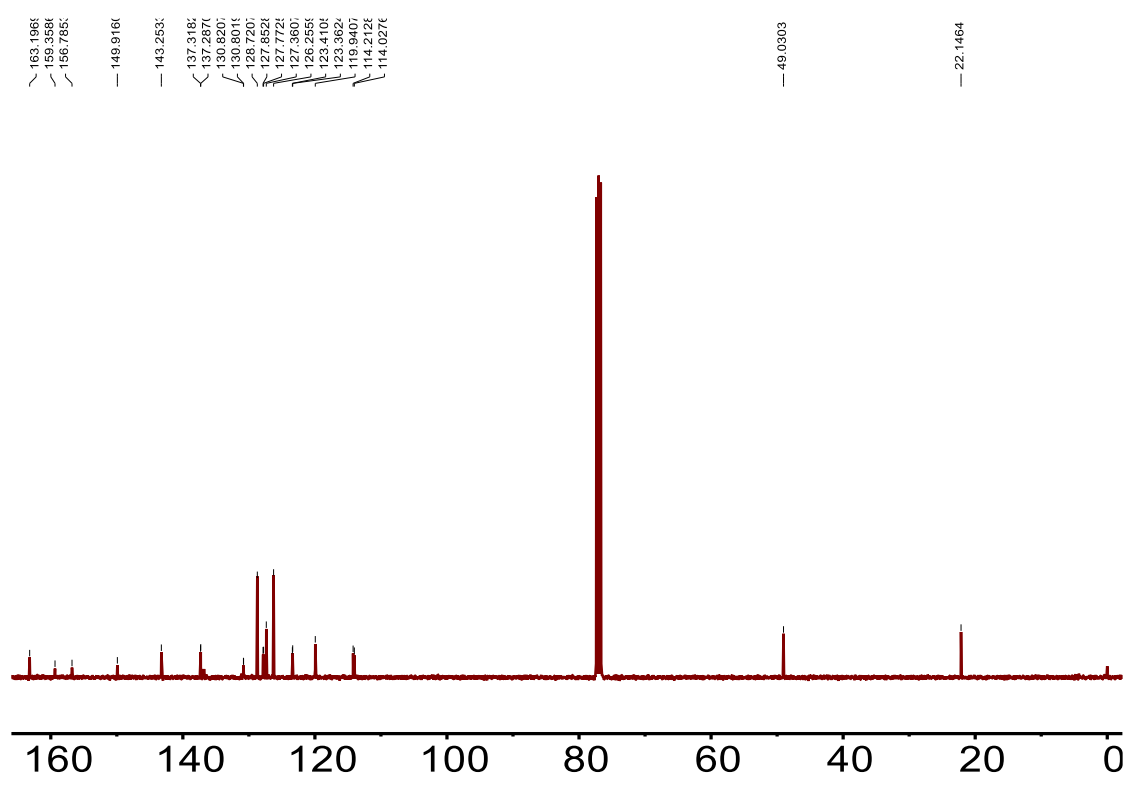

<sup>19</sup>F NMR

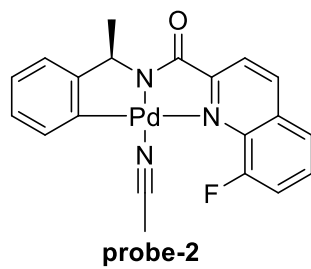

-117.9046  
-117.9163  
-117.9345  
-117.9468

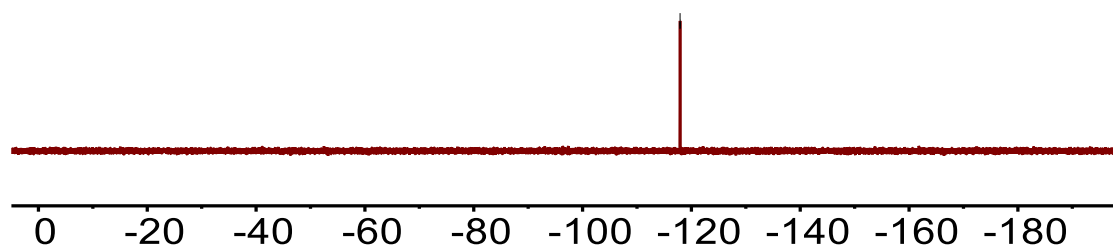



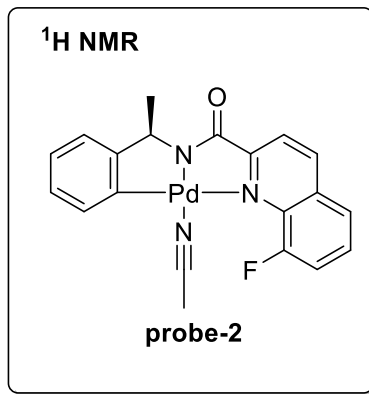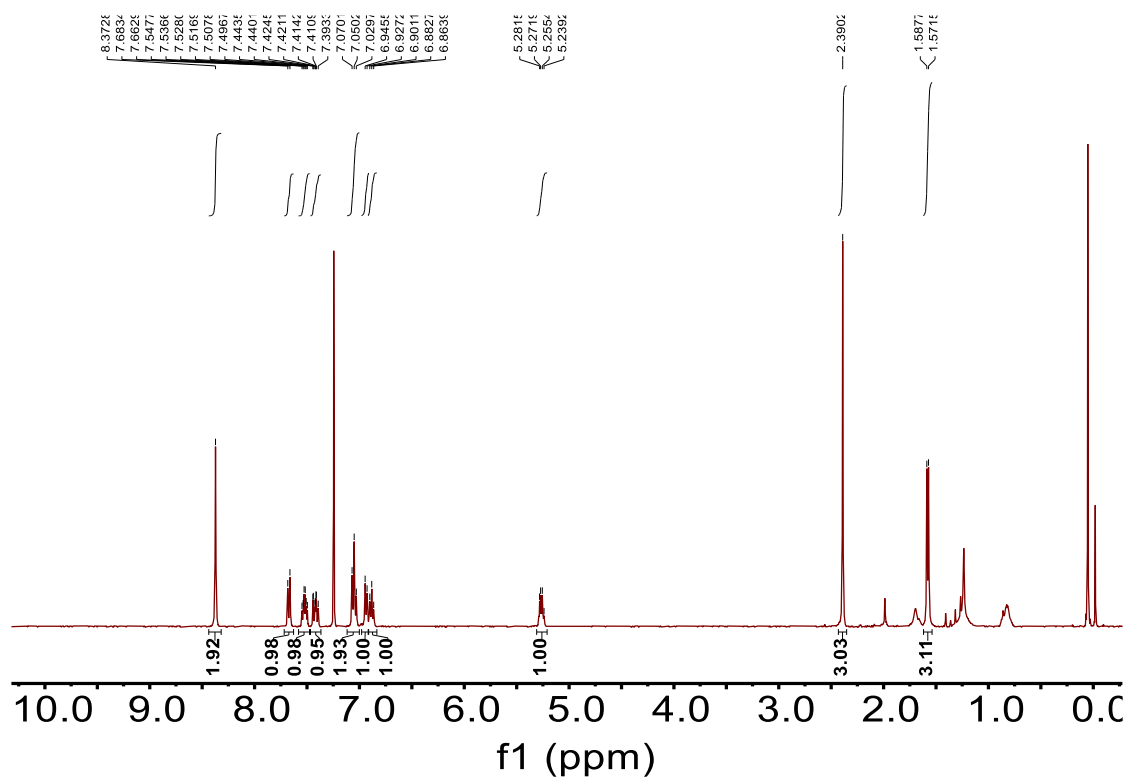

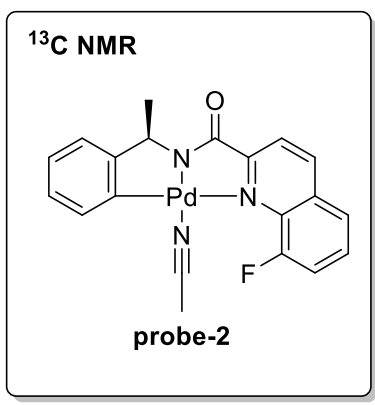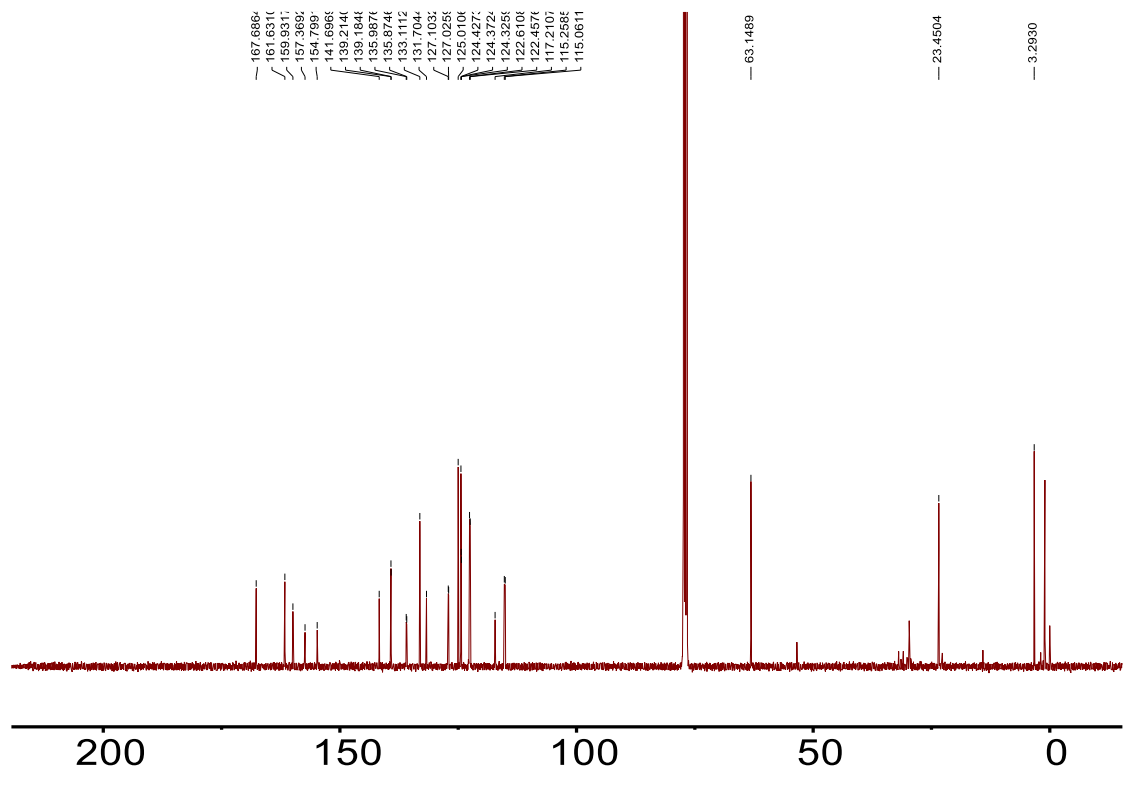

Supplement: d4cc01313a1.pdf [file d4cc01313a1.pdf]
